# Supplementary material
Source: publisher figshare collection journal article supplement (https://acs.figshare.com/ndownloader/files/9697759)
Supplement: Supplementary file 1 [file 9697759]

## SUPPORTING INFORMATION

### Understanding the Lithiation of Sn Anode for High Performance Li-ion Batteries with Exploration of Novel Li-Sn Compounds at Ambient and Moderately High Pressure

Raja Sen and Priya Johari\*

*Department of Physics, School of Natural Sciences,  
Shiv Nadar University, Greater Noida,  
Gautam Buddha Nagar, UP 201 314, India.*

---

\*Electronic address: [priya.johari@snu.edu.in](mailto:priya.johari@snu.edu.in), [psony11@gmail.com](mailto:psony11@gmail.com)

# Contents

|                                                                                                                                                          |      |
|----------------------------------------------------------------------------------------------------------------------------------------------------------|------|
| 1. Computational details                                                                                                                                 | S-3  |
| 2. Phonon dispersion curves of Li-Sn compounds                                                                                                           | S-6  |
| 3. Fitness of selected experimentally identified Li-Sn compounds<br>at 1 atm, 5, 10, and 20 GPa Convexhull                                               | S-8  |
| 4. Formation enthalpies (FEs) of Li-Sn compounds appeared at<br>1 atm, 5, 10, and 20 GPa convexhull and the contribution of<br>ZPE on the FEs at 1 atm   | S-9  |
| 5. Thermodynamic stability of $\text{Li}_{17}\text{Sn}_4$ at high pressure                                                                               | S-10 |
| 6. Experimentally known Li-Sn stoichiometries                                                                                                            | S-11 |
| a $\text{Li}_2\text{Sn}_5$ : . . . . .                                                                                                                   | S-11 |
| b $\text{Li}_1\text{Sn}_1$ : . . . . .                                                                                                                   | S-12 |
| c $\text{Li}_7\text{Sn}_3$ : . . . . .                                                                                                                   | S-13 |
| d $\text{Li}_5\text{Sn}_2$ : . . . . .                                                                                                                   | S-13 |
| e $\text{Li}_{13}\text{Sn}_5$ : . . . . .                                                                                                                | S-14 |
| f $\text{Li}_7\text{Sn}_2$ : . . . . .                                                                                                                   | S-14 |
| 7. Structural parameters                                                                                                                                 | S-16 |
| 8. Shortest interatomic distance for Li-Sn compounds                                                                                                     | S-19 |
| 9. Thermodynamic stability of $\text{Li}_3\text{Sn}_1$                                                                                                   | S-20 |
| 10. Thermodynamic stability of $\text{Li}_4\text{Sn}_1$                                                                                                  | S-20 |
| 11. Thermodynamic stability of $\text{Li}_7\text{Sn}_1$                                                                                                  | S-21 |
| 12. Mechanical properties of Li-Sn compounds                                                                                                             | S-21 |
| 1      Elastic Constants of Li-Sn compounds. . . . .                                                                                                     | S-23 |
| 2      Calculated shear modulus (G), bulk modulus (B),<br>Young's modulus (Y) and Poisson's ratio ( $\nu$ ) for Li,<br>Sn, and Li-Sn compounds . . . . . | S-27 |
| 13. Total and local DOS of Li-Sn compounds at 1 atm pressure                                                                                             | S-29 |
| 14. Theoretical XRD pattern of different Li-Sn compounds                                                                                                 | S-31 |
| References                                                                                                                                               | S-33 |

## 1. Computational details

USPEX has already been demonstrated as a powerful tool to determine the lowest energy structure *via* global minimization of the surface free-energy, with great success.[1, 2] Our calculations to search for stable and metastable structures of Li-Sn compounds were carried out using USPEX in two steps. Firstly, most promising compositions of Li-Sn compounds were explored through variable composition method at 1 atm, 5, 10, and 20 GPa pressure considering up to 40 atoms per unit cell. The calculations were carried out over the course of 50-60 generations where, the first generation was generated randomly with 150-200 structures by sampling 20-25 different compositions. For the subsequent generations, 40 child structures were produced, through different symmetry generators, namely heredity, transmutation, softmutation, and random, with probabilities of 40%, 20%, 20%, and 20%, respectively. In second step, a fixed composition search of each promising stoichiometry of Li-Sn compounds with different number of formula units (depending upon the stoichiometry, it varies from 1 to 5) was carried out for over 30-40 generations, with 30-35 different structures in each generation. The population of first generation in fixed composition search was also set with 80-120 structures, in order to densely map the configuration space of random search.

In general, study of Gibbs free energy ( $G = H - TS$ ; here  $H$ ,  $T$ , and  $S$  describe the enthalpy, temperature and entropy, respectively, of the system) is the essential criterion to decide the thermodynamical stability of any compounds. However, DFT study always deals with 0 K temperature, implying  $G = H$ . Therefore, through out the manuscript we only discussed the enthalpies of the Li-Sn compounds at different pressure. Here, it is also believed that magnitude of vibrational energies ( $TS$ ) towards total free energy would be negligibly small near room temperature and therefore can not change the order of thermodynamics of stability of Li-Sn compounds.

Therefore, negative enthalpy of formation which is the basic criterion for finding the energetically stable compounds was calculated *via* below equation:

$$\Delta H_f(\text{Li}_x\text{Sn}_y) = \frac{[H(\text{Li}_x\text{Sn}_y) - xH(\text{Li}) - yH(\text{Sn})]}{(x + y)} \quad (1)$$

where,  $H = U + PV$  is the enthalpy of each compositions in their crystal form and  $\Delta H_f$  is the formation enthalpy of the compound per atom. In the expression of enthalpy,  $U$ ,  $P$ , and  $V$  represent the internal energy, pressure, and volume, respectively.

It should be noted that for a given stoichiometry and pressure, the structure having lowest negative value of formation enthalpy can be considered as most favorable phase as compared to others. But, in order to judge the thermodynamic stability of a particular Li-Sn compound with respect to two nearest neighbor compositions and/or pure elements at ambient or high pressure, it is important to draw the thermodynamic convex hull. The thermodynamic convex hull which, is a representater of compound's formation enthalpy with its respective stoichiometric ratio at given pressure, is also able to elucidate the all possible decomposition routes. Basically, a phase can be identified as thermodynamically stable ground state phase if it lies on the convex hull. Hence, the stoichiometries that do not have a representative structure on the convex hull, are considered as either metastable or unstable. However, in order to govern the local (meta)stability, we further investigated the phonon dispersion curves of all respective Li-Sn compounds. A structure can be considered as dynamically stable, if and only if, no imaginary phonon frequencies are detected through out the Brillouin zone in phonon dispersion curve.

The structure relaxation of all compositions generated by USPEX were accomplished using first-principles density functional theory (DFT) with the atomic force convergence criterion of 0.001 eV/Å as implemented in the Vienna Ab-initio Simulation Package (VASP).[3, 4] The electron-ion interactions were treated using projector-augmented-wave (PAW) pseudo-potentials,[5] while, to account exchange correlation effects, the generalized gradient approximation (GGA) functional in PBE (Perdew–Burke–Ernzerhof) flavor was used.[6] The plane-wave kinetic energy cutoff was considered as 700 eV, while the reciprocal space resolution for  $k$ -points generation in final structures relaxation and enthalpy calculations was set to  $0.02 \times 2\pi \text{ \AA}^{-1}$  with uniform  $\Gamma$ -centered meshes. All the above mentioned parameters ensure that the enthalpy calculations are well converged with fluctuation in enthalpy to be less than 1 meV/atom. In order to probe the dynamical stability, phonon frequencies throughout the whole Brillouin Zone were calculated using density functional perturbation theory (DFPT) as implemented in the VASP code along with the Phonopy package.[7] Depending upon the primitive cells structure,  $l \times m \times n$  supercells (where,  $2 \leq l, m, n \leq 3$ ) were used to calculate the phonon dispersion curve. In addition, the theoretical gravimetric capacity, GC, was also determined using following equation:

$$\text{GC} = \frac{x\text{F}}{M_{\text{Sn}}} \quad (2)$$

where,  $x$  is the number of Li atoms present in  $\text{Li}_x\text{Sn}$ ,  $F$  is the Faraday constant, and  $M_{\text{Sn}}$  represents the Molar-Mass of Sn.

To examine mechanical properties, elastic constants were calculated using the VASP code, while the bulk modulus ( $B$ ), shear modulus ( $G$ ), Young modulus ( $Y$ ), and Poisson's ratio ( $\nu$ ) were estimated using the Voigt-Reuss-Hill approximation (Section 12 of SI).[8] Finally, in order to guide the synthesis of unknown Li-Sn compounds, X-ray diffraction powder patterns of all studied phases of Li-Sn were simulated via Mercury software (Figure S14 of SI).[9]

## 2. Phonon dispersion curves of Li-Sn compounds

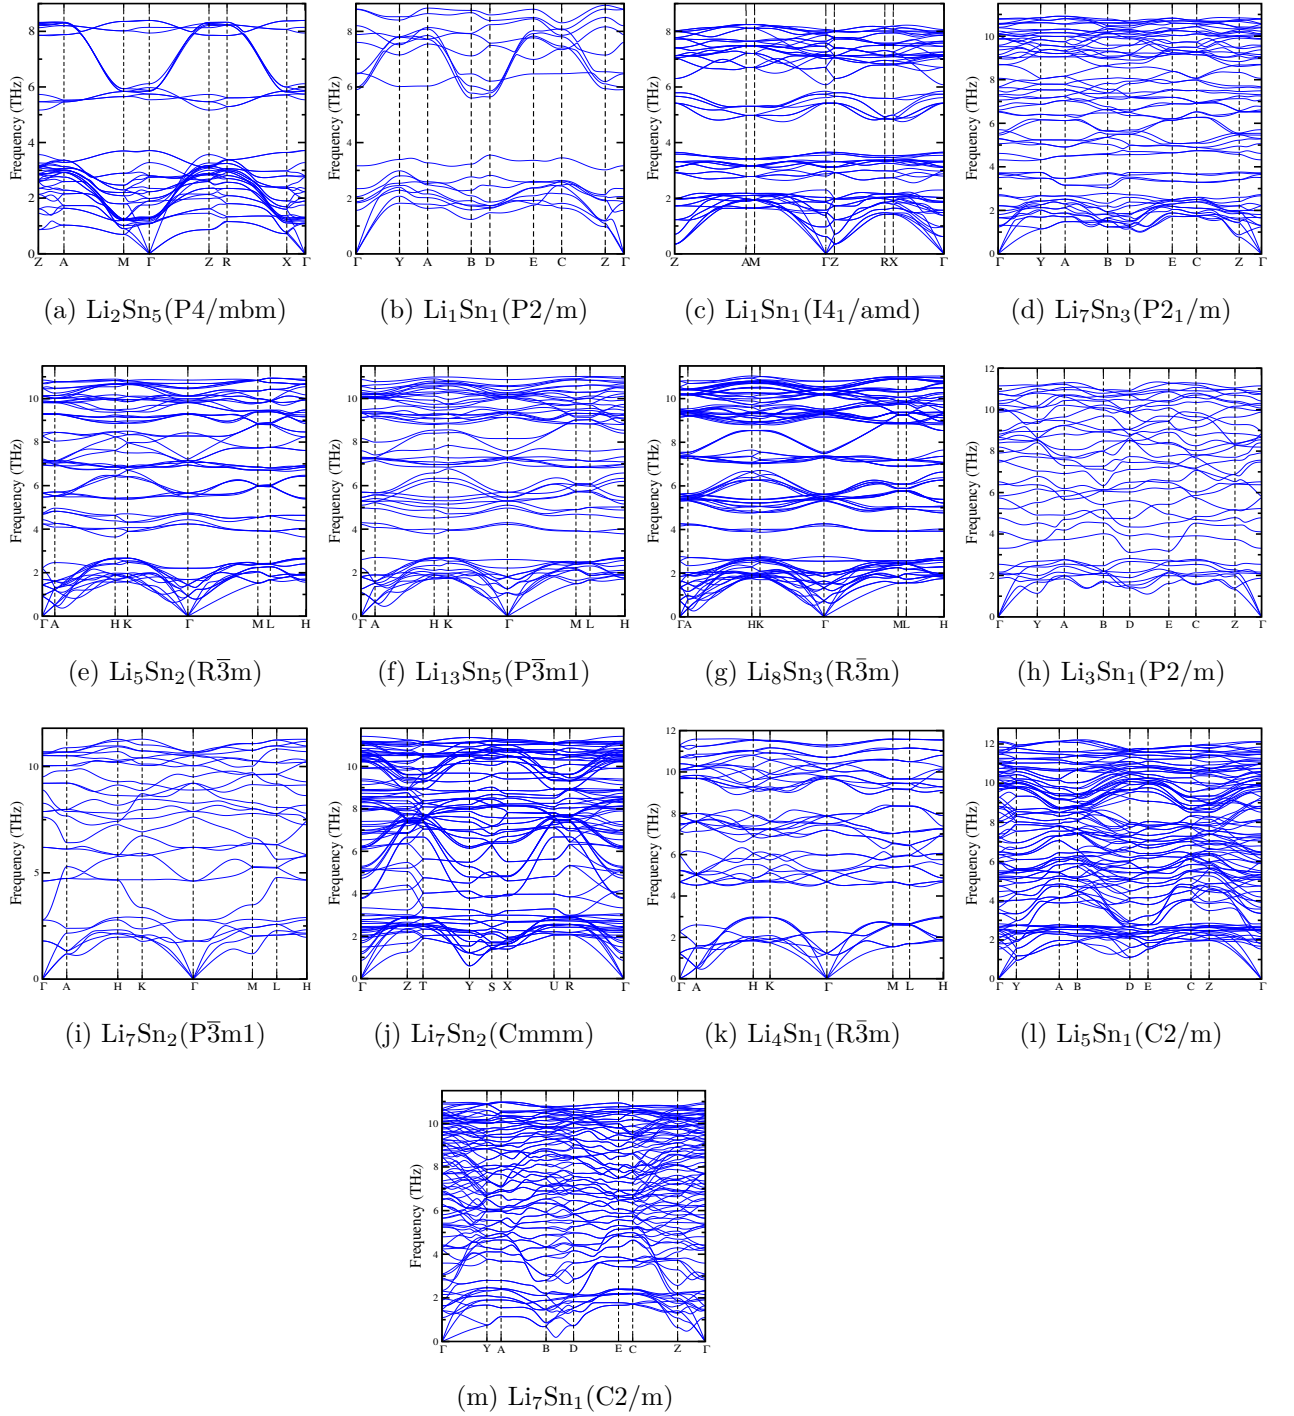

Figure S1: Phonon dispersion curves of: (a)  $\text{Li}_2\text{Sn}_5(\text{P4}/\text{mbm})$ , (b)  $\text{Li}_1\text{Sn}_1(\text{P2}/\text{m})$ , (c)  $\text{Li}_1\text{Sn}_1(\text{I4}_1/\text{amd})$ , (d)  $\text{Li}_7\text{Sn}_3(\text{P2}_1/\text{m})$ , (e)  $\text{Li}_5\text{Sn}_2(\text{R}\bar{3}\text{m})$ , (f)  $\text{Li}_{13}\text{Sn}_5(\text{P}\bar{3}\text{m1})$ , (g)  $\text{Li}_8\text{Sn}_3(\text{R}\bar{3}\text{m})$ , (h)  $\text{Li}_3\text{Sn}_1(\text{P2}/\text{m})$ , (i)  $\text{Li}_7\text{Sn}_2(\text{P}\bar{3}\text{m1})$ , (j)  $\text{Li}_7\text{Sn}_2(\text{Cmmm})$ , (k)  $\text{Li}_4\text{Sn}_1(\text{R}\bar{3}\text{m})$ , (l)  $\text{Li}_5\text{Sn}_1(\text{C2}/\text{m})$  and (m)  $\text{Li}_7\text{Sn}_1(\text{C2}/\text{m})$ , appeared at 1 atm convex-hull. Curves are arranged in an increasing order of Li-content.

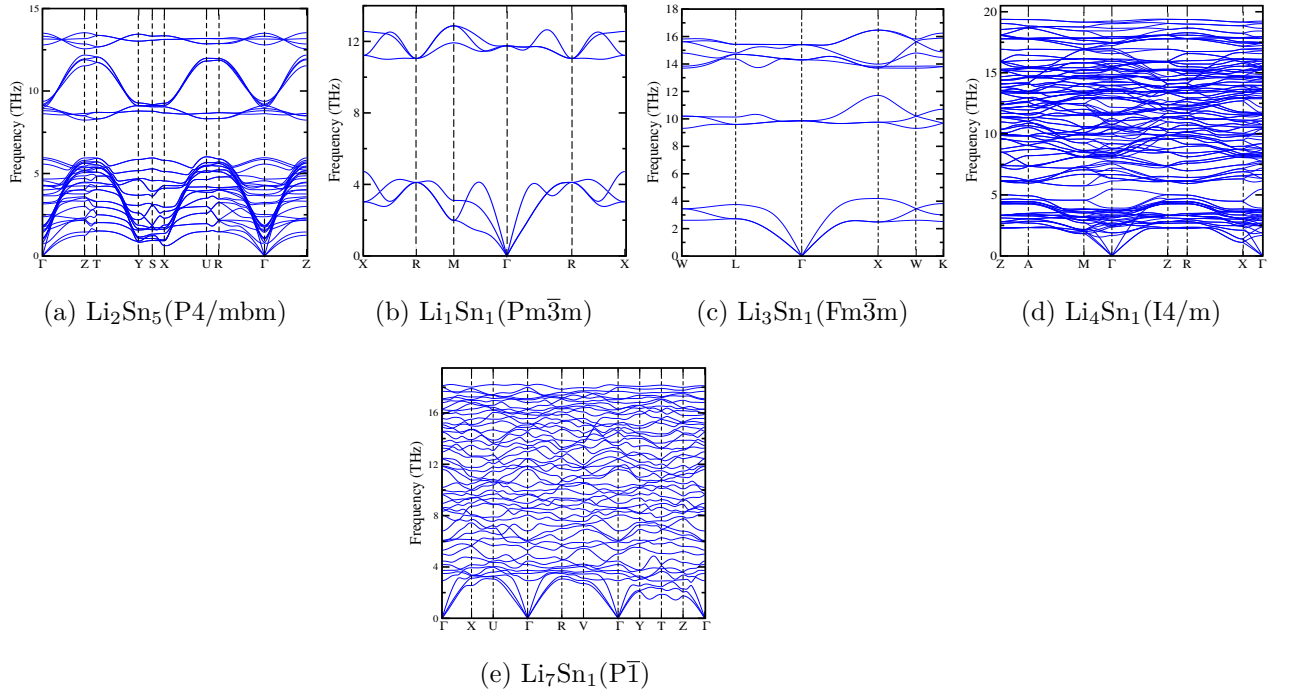

Figure S2: Phonon dispersion curves of: (a)  $\text{Li}_2\text{Sn}_5(\text{P4}/\text{mbm})$ , (b)  $\text{Li}_1\text{Sn}_1(\text{Pm}\bar{3}\text{m})$ , (c)  $\text{Li}_3\text{Sn}_1(\text{Fm}\bar{3}\text{m})$ , (d)  $\text{Li}_4\text{Sn}_1(\text{I4}/\text{m})$ , and (e)  $\text{Li}_7\text{Sn}_1(\text{P}\bar{1})$ , appeared at 20 GPa convex-hull. Curves are arranged in an increasing order of Li-content.

### 3. Fitness of selected experimentally identified Li-Sn compounds at 1 atm, 5, 10, and 20 GPa Convexhull

Table T1: Fitness (vertical distance to the convex hull) of selected experimentally identified Li-Sn compounds at 1 atm, 5, 10, and 20 GPa Convex hull. The decomposition energy of these experimentally identified compounds is measured via vertical length from the convex hull tie line.

| Stoichiometry               | Fitness (eV/atom) |           |            |            |
|-----------------------------|-------------------|-----------|------------|------------|
|                             | P = 1 atm         | P = 5 GPa | P = 10 GPa | P = 20 GPa |
| $\text{Li}_2\text{Sn}_5$    | 0.0027            | 0.0000    | 0.0042     | 0.0315     |
| $\text{Li}_7\text{Sn}_3$    | 0.0013            | 0.0012    | 0.0015     | 0.0028     |
| $\text{Li}_5\text{Sn}_2$    | 0.0020            | 0.0012    | 0.0006     | 0.0000     |
| $\text{Li}_{17}\text{Sn}_4$ | 0.0000            | 0.0000    | 0.0004     | 0.0209     |



**4. Formation enthalpies (FEs) of Li-Sn compounds appeared at 1 atm, 5, 10, and 20 GPa convexhull and the contribution of ZPE on the FEs at 1 atm**

Table T2: Formation enthalpies (FEs) of Li-Sn compounds appeared at 1 atm, 5, 10, and 20 GPa convexhull and the contribution of ZPE on the FEs at 1 atm pressure.

| Stoichiometry                    | Composition ratio | Formation enthalpy (FE) without ZPE correction |                 |                    |                 |                    |                 |                    |                 | Contribution of ZPE on    |
|----------------------------------|-------------------|------------------------------------------------|-----------------|--------------------|-----------------|--------------------|-----------------|--------------------|-----------------|---------------------------|
|                                  |                   | (eV/atom)                                      |                 |                    |                 |                    |                 |                    |                 | the enthalpy of formation |
|                                  |                   | P = 1 atm                                      |                 | P = 5 GPa          |                 | P = 10 GPa         |                 | P = 20 GPa         |                 | at 1 atm pressure         |
|                                  |                   | Symmetry                                       | FE<br>(eV/atom) | Symmetry           | FE<br>(eV/atom) | Symmetry           | FE<br>(eV/atom) | Symmetry           | FE<br>(eV/atom) | (meV/atom)                |
| Li <sub>x</sub> Sn <sub>y</sub>  | {y/x+y}           |                                                |                 |                    |                 |                    |                 |                    |                 |                           |
| Li <sub>2</sub> Sn <sub>5</sub>  | 0.7143            | P4/mbm                                         | -0.1844         | Pbam               | -0.2552         | Pbam               | -0.2738         | Pbam               | -0.2985         | 7.0                       |
| Li <sub>1</sub> Sn <sub>1</sub>  | 0.5000            | P2/m                                           | -0.3273         | P2/m               | -0.4306         | Pm $\bar{3}$ m     | -0.4865         | Pm $\bar{3}$ m     | -0.5776         | -6.0                      |
|                                  |                   | I4 <sub>1</sub> /amd                           | -0.3208         |                    |                 |                    |                 |                    |                 | -6.0                      |
| Li <sub>7</sub> Sn <sub>3</sub>  | 0.3000            | P2 <sub>1</sub> /m                             | -0.3908         | P2 <sub>1</sub> /m | -0.5055         | P2 <sub>1</sub> /m | -0.5742         | P2 <sub>1</sub> /m | -0.6783         | 3.0                       |
| Li <sub>5</sub> Sn <sub>2</sub>  | 0.2857            | R $\bar{3}$ m                                  | -0.3948         | R $\bar{3}$ m      | -0.5109         | R $\bar{3}$ m      | -0.5814         | R $\bar{3}$ m      | -0.6886         | 2.0                       |
| Li <sub>13</sub> Sn <sub>5</sub> | 0.2778            | P $\bar{3}$ m1                                 | -0.3994         | P $\bar{3}$ m1     | -0.5152         | P $\bar{3}$ m1     | -0.5856         | P $\bar{3}$ m1     | -0.6926         | 3.0                       |
| Li <sub>8</sub> Sn <sub>3</sub>  | 0.2727            | R $\bar{3}$ m                                  | -0.3990         | R $\bar{3}$ m      | -0.5148         | R $\bar{3}$ m      | -0.5853         | R $\bar{3}$ m      | -0.6927         | 3.0                       |
| Li <sub>3</sub> Sn <sub>1</sub>  | 0.2500            | P2/m                                           | -0.3828         | Fm $\bar{3}$ m     | -0.4989         | Fm $\bar{3}$ m     | -0.5696         | Fm $\bar{3}$ m     | -0.6784         | 3.0                       |
| Li <sub>7</sub> Sn <sub>2</sub>  | 0.2222            | P $\bar{3}$ m1                                 | -0.3769         | P $\bar{3}$ m1     | -0.4858         | P $\bar{3}$ m1     | -0.5525         | P $\bar{3}$ m1     | -0.6528         | 5.0                       |
|                                  |                   | Cmmm                                           | -0.3712         |                    |                 |                    |                 |                    |                 | 4.0                       |
| Li <sub>4</sub> Sn <sub>1</sub>  | 0.2000            | R $\bar{3}$ m                                  | -0.3443         | R $\bar{3}$ m      | -0.4446         | R $\bar{3}$ m      | -0.5065         | I4/m               | -0.6086         | 5.0                       |
| Li <sub>17</sub> Sn <sub>4</sub> | 0.1905            | F $\bar{4}$ 3m                                 | -0.3491         | F $\bar{4}$ 3m     | -0.4399         | F $\bar{4}$ 3m     | -0.4915         | F $\bar{4}$ 3m     | -0.5645         | Not Calculated            |
| Li <sub>5</sub> Sn <sub>1</sub>  | 0.1667            | C2/m                                           | -0.2951         | C2/m               | -0.3900         | C2/m               | -0.4466         | C2/m               | -0.5275         | 3.0                       |
| Li <sub>7</sub> Sn <sub>1</sub>  | 0.1250            | C2/m                                           | -0.2137         | C2/m               | -0.2793         | C2/m               | -0.3204         | P $\bar{1}$        | -0.4040         | 6.0                       |

## 5. Thermodynamic stability of $\text{Li}_{17}\text{Sn}_4$ at high pressure

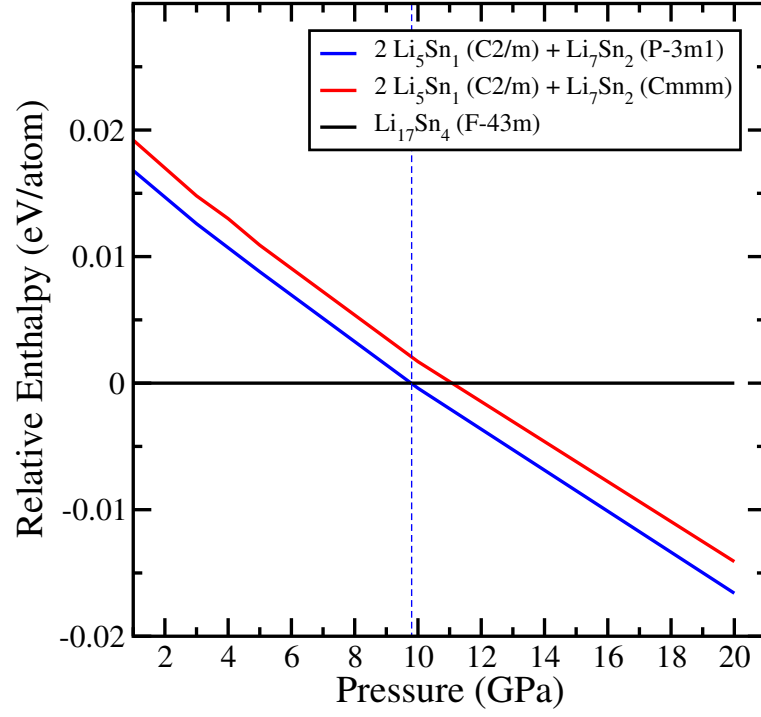

Figure S3: Enthalpies of decomposition of  $\text{Li}_{17}\text{Sn}_4$  into  $\text{Li}_5\text{Sn}_1$  +  $\text{Li}_7\text{Sn}_2$  as a function of pressure.

## 6. Experimentally known Li-Sn stoichiometries

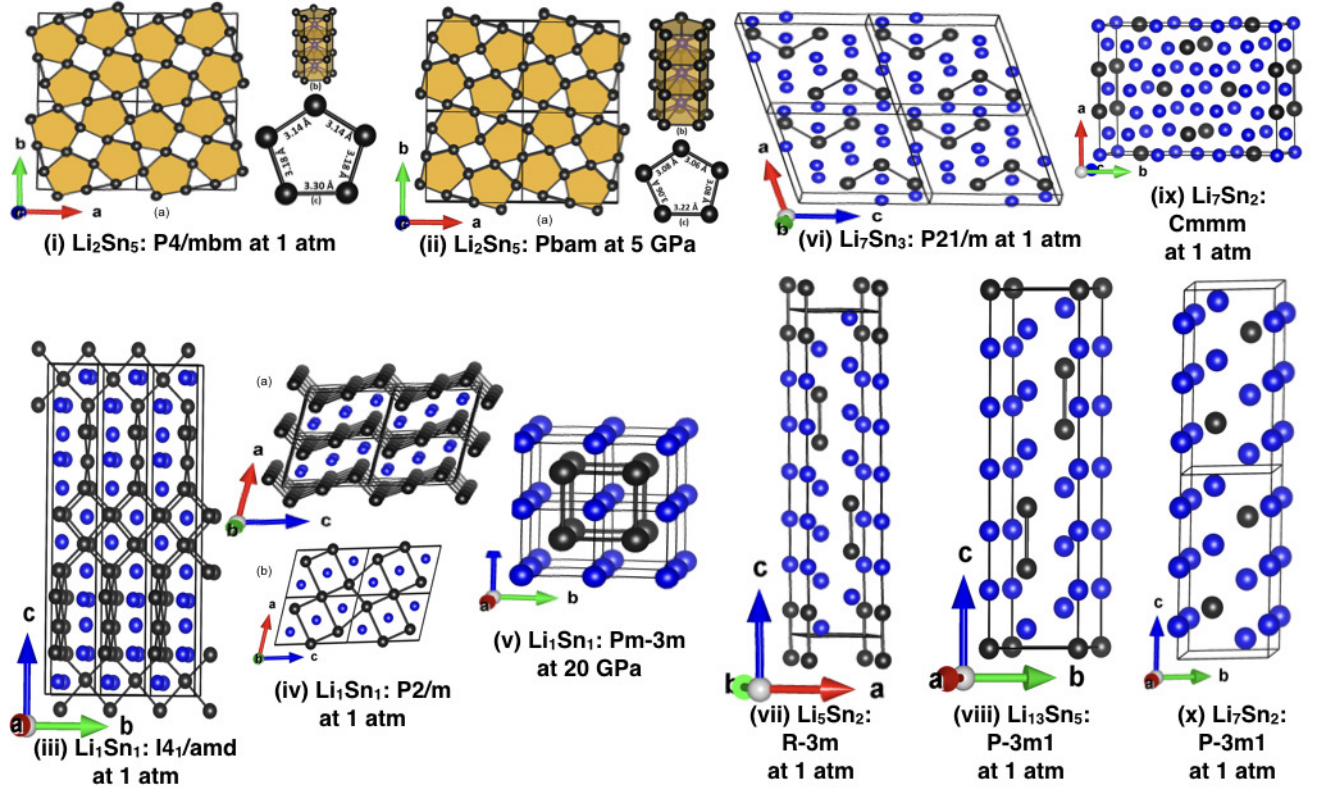

Figure S4: Crystal structures of experimentally known Li-Sn compounds: (i)  $\text{Li}_2\text{Sn}_5$ :  $P4/\text{mbm}$  at 1 atm, (ii)  $\text{Li}_2\text{Sn}_5$ :  $P\text{bam}$  at 5 GPa, (iii)  $\text{Li}_1\text{Sn}_1$ :  $I4_1/\text{amd}$  at 1 atm, (iv)  $\text{Li}_1\text{Sn}_1$ :  $P2/\text{m}$  at 1 atm, (v)  $\text{Li}_1\text{Sn}_1$ :  $Pm\bar{3}m$  at 20 GPa, (vi)  $\text{Li}_7\text{Sn}_3$ :  $P2_1/\text{m}$  at 1 atm (vii)  $\text{Li}_5\text{Sn}_2$ :  $R\bar{3}m$  at 1 atm, (viii)  $\text{Li}_{13}\text{Sn}_5$ :  $P\bar{3}m1$  at 1 atm, (ix)  $\text{Li}_7\text{Sn}_2$ :  $\text{Cmmm}$  at 1 atm, and (x)  $\text{Li}_7\text{Sn}_2$ :  $P\bar{3}m1$  at 1 atm. Here, blue and black spheres represent Li and Sn atoms, respectively.

*a.  $\text{Li}_2\text{Sn}_5$ :* The Sn-rich  $\text{Li}_2\text{Sn}_5$  is known to crystallize in the tetragonal system with space group  $P4/\text{mbm}$  (Figure S4-(i) in SI).[10] Our calculations also predict the same phase to exist till 3.9 GPa, while beyond that  $P4/\text{mbm}$  structure is found to transform into an orthorhombic structure with space group  $P\text{bam}$  (Figure S5 in SI). The  $P4/\text{mbm}$  -  $\text{Li}_2\text{Sn}_5$  (with  $Z = 2$ ) which is isostructural with  $\text{Mn}_2\text{Hg}_5$ , contains pentagonal prisms of Sn with two Li at the extended pole through the center of each prism. This can also be imagined as an infinite number of triangle-quadrangle-pentagon net of Sn atoms in  $ab$ - plane with Li atoms sandwiched between the two 2D layers of Sn perpendicular to  $c$ -axis (Figure S4-(i) in SI). While, the high pressure  $P\text{bam}$  (with  $Z = 2$ ) structure is basically the lower symmetry subgroup of the  $P4/\text{mbm}$  with  $a = 10.365 \text{ \AA}$ ,  $b = 9.745 \text{ \AA}$ , and  $c = 3.045 \text{ \AA}$  at 5 GPa pressure (Figure S4-(ii) in SI). At 1 atm pressure, Li-Li, Li-Sn, and Sn-Sn

bond lengths are found to be 3.14 Å, 3.00 Å, and 3.14 Å, respectively, while the respective values get reduced to 2.89 Å, 2.72 Å, and 2.89 Å at 20 GPa pressure.

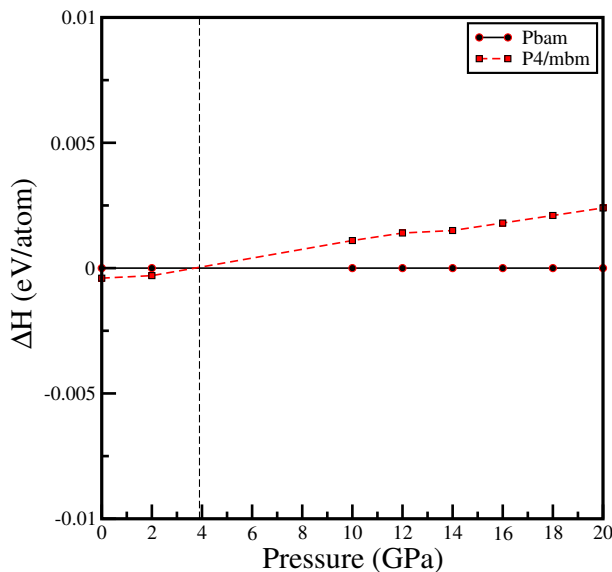

Figure S5: Thermodynamic stability of  $\text{Li}_2\text{Sn}_5$ . Pressure driven **P4/mbm** to **Pbam** phase transition of  $\text{Li}_2\text{Sn}_5$  is shown.

*b.  $\text{Li}_1\text{Sn}_1$ :* In case of  $\text{Li}_1\text{Sn}_1$ , two types of structures are experimentally reported at ambient pressure:  $\alpha - \text{Li}_1\text{Sn}_1$  which crystallizes in the monoclinic system (space group P2/m,  $Z = 3$ , Figure S4-(iv) in SI) and  $\beta - \text{Li}_1\text{Sn}_1$  which belongs to the tetragonal symmetry (space group  $\text{I4}_1/\text{amd}$ ,  $Z = 12$ , Figure S4-(iii) in SI).[11, 12] Our calculations however predict P2/m phase to be energetically more favorable than  $\text{I4}_1/\text{amd}$  by 6 meV/atom at ambient pressure with Li-Li, Li-Sn, and Sn-Sn bond lengths to be 3.11 Å, 3.00 Å, and 3.05 Å, respectively. Interestingly, with the increase in pressure, stability of  $\beta - \text{Li}_1\text{Sn}_1$  further decreases as compared to  $\alpha - \text{Li}_1\text{Sn}_1$ .  $\text{Li}_1\text{Sn}_1$  structure in P2/m phase contains a series of infinite 2D rumpled like surface layers of Sn with Li intercalated in between (Figure S4-(iv)-a in SI). Above, 9 GPa, this phase gets transformed to  $\text{Pm}\bar{3}\text{m}$  with  $Z=1$  (Figure S6 in SI), where the rumpled layers gets converted into 2D flat layers having alternative stacking of Sn and Li atoms (Figure S4-(v) in SI). At 20 GPa, the nearest Li-Li (3.14 Å) and Sn-Sn (3.14 Å) distance remains almost same as in case of P2/m phase at 1 atm pressure, while Li-Sn distance reduces to 2.72 Å.

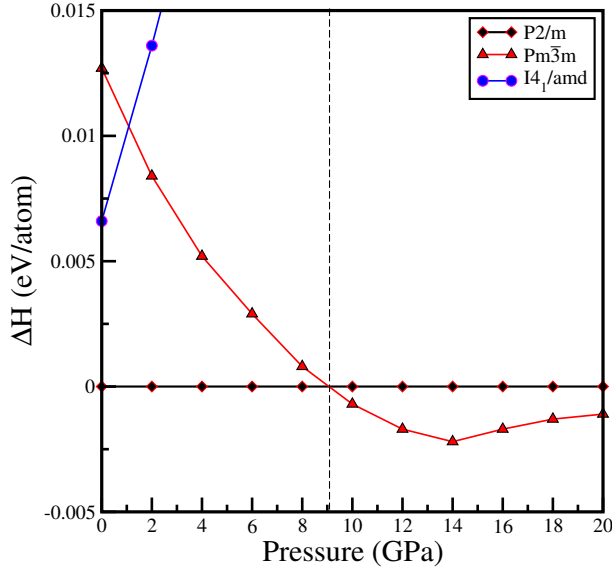

Figure S6: Thermodynamic stability of  $\text{Li}_1\text{Sn}_1$ . Pressure driven  $\text{P2}/\text{m}$  to  $\text{Pm}\bar{3}\text{m}$  phase transition of  $\text{Li}_1\text{Sn}_1$  is shown.

*c.  $\text{Li}_7\text{Sn}_3$ :* It is known that  $\text{Li}_7\text{Sn}_3$  with monoclinic crystal structure having  $\text{P2}_1/\text{m}$  symmetry ( $Z=2$ ) can be made by annealing from high-temperature melting and mechanical alloying process.[13] Our calculations also predict the same structure to be the lowest enthalpy structure but, metastable through out the calculated pressure range (situated roughly 1–3 meV/atom above the convex hull, see Table T1 of SI) The structure contains bent trimers of tin atoms with each atomic chain of Sn exclusively surrounded by Li atoms (Figure S4-(vi) in SI). The Li-Li, Li-Sn, and Sn-Sn bond lengths are found to reduce from 2.80 Å, 2.82 Å, and 2.99 Å at 1 atm pressure to 2.48, 2.50, and 2.79 Å at 20 GPa, respectively.

*d.  $\text{Li}_5\text{Sn}_2$ :* For  $\text{Li}_5\text{Sn}_2$ , in agreement with experimental findings[14] we found the trigonal crystal system with  $\text{R}\bar{3}\text{m}$  phase to be most stable. However, our calculations predict this stoichiometry to be thermodynamically metastable at 1 atm pressure which gets stable only above 19 GPa pressure. The structure of  $\text{Li}_5\text{Sn}_2$  exhibit dumbbells of Sn after every 5 Li atoms in atomic rows, parallel to hexagonal axis. The complete three dimensional structure can be realized by packing these one dimensional linear repeating chains alongside each other (Figure S4-(vii) in SI). It is also noted that the tendency to form Sn-Sn dimers in Li-Sn structures starts from this compositions, which interestingly vanishes when Li occupancy exceeds the value 2.67 per Sn atoms. However, as an exception,  $\text{Li}_7\text{Sn}_2$  having space group  $\text{Cmmm}$  (which is not found the stable phase as per our calculations) found to exhibit Sn-Sn isolated dumbbells.[15] The Li-Li, Li-Sn, and Sn-Sn bond lengths in  $\text{Li}_5\text{Sn}_2$ , are found to reduce from 2.79 Å, 2.78 Å, and 2.93

Å at 1 atm pressure to 2.46 Å, 2.47 Å, and 2.75 Å at 20 GPa, respectively.

*e. Li<sub>13</sub>Sn<sub>5</sub>:* The crystal structure of Li<sub>13</sub>Sn<sub>5</sub> was first determined by Frank et al.[16] They demonstrated it to crystallize in trigonal structure (space group  $P\bar{3}m1$ ) with 18 atoms per unit cell. Our *ab-initio* evolutionary calculations reveal exactly the same symmetry as the ground state structure of Li<sub>13</sub>Sn<sub>5</sub> with  $a = 4.702$  Å and  $c/a = 3.644$  at 1 atm pressure. The atomic packing of the structure is very similar to  $R\bar{3}m$ -Li<sub>5</sub>Sn<sub>2</sub> structure, with only a difference that alongside Sn-Sn dimmers, monomers of Sn can also be found in the  $P\bar{3}m1$  – Li<sub>13</sub>Sn<sub>5</sub> structure. Thus two different types of linear repeating chains: one with Sn-Sn dimers (dimer length  $\sim 2.92$  Å) after every 5 Li atoms and another having monomer of Sn after every 5 Li atoms with ratio 2:1, are the basic building blocks of the three dimensional structure (Figure S4-(viii) in SI). Moreover, Li<sub>13</sub>Sn<sub>5</sub> is also a perfect example of long range b.c.c superstructure along  $[1\bar{1}0]$ ,  $[01\bar{1}]$ ,  $[111]$  directions where it is easy to observe the rhombic dodecahedron for Li atoms with Sn atom at the center. The minimum Li-Li, Li-Sn, and Sn-Sn bond lengths in Li<sub>13</sub>Sn<sub>5</sub>, are found to reduce from 2.81 Å, 2.79 Å, and 2.92 Å at 1 atm pressure to 2.47 Å, 2.48 Å, and 2.75 Å at 20 GPa, respectively.

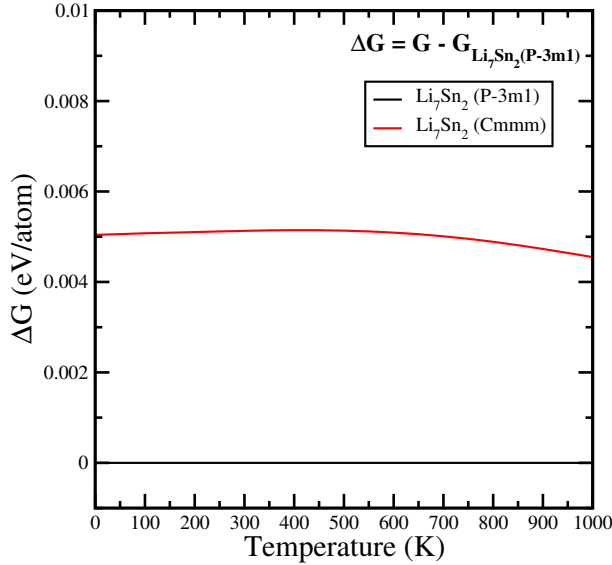

Figure S7: Thermodynamic stability of **Li<sub>7</sub>Sn<sub>2</sub>**.

*f. Li<sub>7</sub>Sn<sub>2</sub>:* In case of Li<sub>7</sub>Sn<sub>2</sub>, experimentally known phase is Cmmm ( $Z = 4$ ) which reflects Li<sub>7</sub>Sn<sub>2</sub> to crystallize in orthorhombic crystal system(Figure S4-(ix)),[15] while our DFT-GGA based calculations predict a more symmetric trigonal crystal system with  $P\bar{3}m1$  phase (with  $Z = 1$ , Figure S4-(x) in SI) to be enthalpically more stable than the experimentally known phase (with structural energy difference,  $\Delta E \leq 6$  meV/atom). Such discrepancy was also found in the

study of Genser et. al. for the Li-Sn system,[17] as well as in the study of Morris et. al. for the Li-Ge system.[18] However, keeping in mind that inclusion of zero point energy and lattice vibrational effect due to temperature may alter this discrepancy, we further calculate the Gibbs free energy vs. temperature of both the phases (calculated under quasi-harmonic approximation) at ambient pressure. But no such temperature driven phase transition is observed in between 0 to 1000K in our calculations(Figure S7 in SI). Thus, all the results strongly demand a reinvestigation on  $\text{Li}_7\text{Sn}_2$  compound. The  $\text{P}\bar{3}\text{m}1$ -  $\text{Li}_7\text{Sn}_2$  phase is found to be isostructural with  $\text{Li}_7\text{Pb}_2$ . The optimized lattice parameters of  $\text{P}\bar{3}\text{m}1$ -  $\text{Li}_7\text{Sn}_2$  phase obtained at ambient pressure are:  $a = 4.681 \text{ \AA}$  and  $c/a = 1.816$ , which are about 1–4% higher than reported by Genser et. al.[17] based on the local density approximation (LDA). The atomic arrangement of the  $\text{P}\bar{3}\text{m}1$ -  $\text{Li}_7\text{Sn}_2$  structure is found to be almost same as the structure of  $\text{Li}_5\text{Sn}_2$  and  $\text{Li}_{13}\text{Sn}_5$ , with a difference that Sn-Sn dimers get completely disappeared. The Sn-Sn nearest neighbor distance increases drastically from  $2.92 \text{ \AA}$  in  $\text{Li}_{13}\text{Sn}_5$  to  $> 4.69 \text{ \AA}$  in  $\text{P}\bar{3}\text{m}1$ -  $\text{Li}_7\text{Sn}_2$ . The trend continues in Li-Sn stoichiometries with higher Li-concentration as well. This is primarily due to the higher Pauling electronegativity of Sn (1.96), which forces all Sn atoms to fulfill the “octet rule” by acquiring a large proportion of charge from highly accessed neighbouring Li atoms and hence, only monomers of Sn exist in Li-rich Sn compounds. Thus, in the complete structure of  $\text{Li}_7\text{Sn}_2$ , two different types of linear repeating chains: one with pure Li atoms and another having monomer of Sn after every 2 Li atoms with ratio 1:2, can be seen (Figure S4-(x) in SI). Similar rows of atoms are also seen in  $\text{Cmmm}$ -  $\text{Li}_7\text{Sn}_2$  phase along  $[110]$  direction. But, in  $\text{Cmmm}$ -  $\text{Li}_7\text{Sn}_2$  structure, the distance between two monomers of Sn in an inter atomic row is  $3.21 \text{ \AA}$  instead of  $4.69 \text{ \AA}$  as observed in  $\text{P}\bar{3}\text{m}1$ -  $\text{Li}_7\text{Sn}_2$  structure (Figure S4-(ix) in SI). The minimum Li-Li, Li-Sn, and Sn-Sn bond lengths in  $\text{P}\bar{3}\text{m}1$ - $\text{Li}_7\text{Sn}_2$ , are found to reduce from  $2.73 \text{ \AA}$ ,  $2.80 \text{ \AA}$ , and  $4.69 \text{ \AA}$  at 1 atm pressure to  $2.38 \text{ \AA}$ ,  $2.53 \text{ \AA}$ , and  $4.16 \text{ \AA}$  at 20 GPa, respectively.

## 7. Structural parameters

Table T3: Crystal structures of selective Li-Sn compounds at 1 atm pressure and the corresponding atomic Bader charges (Q).

| Stoichiometry<br>(Space Group)                              | Lattice parameters<br>(a, b, and c in Å)<br>( $\alpha$ , $\beta$ , and $\gamma$ in degree) | Wyckoff<br>position | X       | Y       | Z       | Q<br>( e ) | Stoichiometry<br>(Space Group)                             | Lattice parameters<br>(a, b, and c in Å)<br>( $\alpha$ , $\beta$ , and $\gamma$ in degree) | Wyckoff<br>position | X       | Y       | Z       | Q             |
|-------------------------------------------------------------|--------------------------------------------------------------------------------------------|---------------------|---------|---------|---------|------------|------------------------------------------------------------|--------------------------------------------------------------------------------------------|---------------------|---------|---------|---------|---------------|
| <b>Li<sub>8</sub>Sn<sub>3</sub></b><br><br>(R $\bar{3}$ m)  | a =4.684                                                                                   | Li(6c)              | 0.00000 | 0.00000 | 0.82187 | +0.83      | <b>Li<sub>7</sub>Sn<sub>1</sub></b><br><br>(C2/m)          | a =15.678                                                                                  | Li(4i)              | 0.03456 | 0.00000 | 0.35549 | +0.81         |
|                                                             | c =31.582                                                                                  | Li(6c)              | 0.00000 | 0.00000 | 0.91151 | +0.83      |                                                            | b =4.826                                                                                   | Li(4i)              | 0.90957 | 0.00000 | 0.98930 | -0.28         |
|                                                             |                                                                                            | Li(6c)              | 0.00000 | 0.00000 | 0.36280 | +0.83      |                                                            | c =8.058                                                                                   | Li(4i)              | 0.34529 | 0.00000 | 0.78165 | -0.05         |
|                                                             |                                                                                            | Li(6c)              | 0.00000 | 0.00000 | 0.27305 | +0.83      |                                                            | $\beta$ =102.67                                                                            | Li(4i)              | 0.59874 | 0.00000 | 0.54851 | +0.81         |
|                                                             |                                                                                            | Sn(6c)              | 0.00000 | 0.00000 | 0.54603 | -1.96      |                                                            |                                                                                            | Li(4i)              | 0.72394 | 0.00000 | 0.90862 | +0.82         |
|                                                             |                                                                                            | Sn(3a)              | 0.00000 | 0.00000 | 0.00000 | -2.68      |                                                            |                                                                                            | Li(4i)              | 0.22114 | 0.00000 | 0.40170 | +0.82         |
|                                                             |                                                                                            |                     |         |         |         |            |                                                            |                                                                                            | Li(4i)              | 0.53519 | 0.00000 | 0.83549 | +0.81         |
|                                                             |                                                                                            |                     |         |         |         |            |                                                            |                                                                                            | Sn(4i)              | 0.16044 | 0.00000 | 0.71642 | -3.73         |
| <b>Li<sub>3</sub>Sn<sub>1</sub></b><br><br>(P2/m)           | a =6.885                                                                                   | Li(2m)              | 0.93728 | 0.00000 | 0.19205 | +0.83      | <b>Li<sub>5</sub>Sn<sub>1</sub></b><br><br>(C2/m)          | a =15.918                                                                                  | Li(8j)              | 0.23212 | 0.23819 | 0.37423 | +0.81         |
|                                                             | b =4.623                                                                                   | Li(2n)              | 0.16962 | 0.50000 | 0.18141 | +0.83      |                                                            | b =5.738                                                                                   | Li(8j)              | 0.35730 | 0.24201 | 0.12869 | +0.81         |
|                                                             | c =7.060                                                                                   | Li(1h)              | 0.50000 | 0.50000 | 0.50000 | +0.83      |                                                            | c =12.043                                                                                  | Li(4i)              | 0.05996 | 0.00000 | 0.38658 | +0.81         |
|                                                             | $\beta$ =104.07                                                                            | Li(2m)              | 0.26323 | 0.00000 | 0.51292 | +0.83      |                                                            | $\beta$ =128.86                                                                            | Li(8j)              | 0.97671 | 0.23903 | 0.87413 | +0.81         |
|                                                             |                                                                                            | Li(2n)              | 0.66288 | 0.50000 | 0.16051 | +0.83      |                                                            |                                                                                            | Li(4i)              | 0.30362 | 0.00000 | 0.86329 | +0.81         |
|                                                             |                                                                                            | Sn(2m)              | 0.38943 | 0.00000 | 0.15420 | -2.23      |                                                            |                                                                                            | Li(8j)              | 0.40011 | 0.22485 | 0.37799 | (+0.81/-0.03) |
|                                                             |                                                                                            | Sn(1f)              | 0.00000 | 0.50000 | 0.50000 | -2.97      |                                                            |                                                                                            | Sn(4i)              | 0.57071 | 0.00000 | 0.36776 | -3.61         |
|                                                             |                                                                                            |                     |         |         |         |            |                                                            |                                                                                            | Sn(4i)              | 0.18370 | 0.00000 | 0.11280 | -3.67         |
| <b>Li<sub>7</sub>Sn<sub>2</sub></b><br><br>(P $\bar{3}$ m1) | a =4.681                                                                                   | Li(2d)              | 0.33333 | 0.66667 | 0.39716 | +0.82      | <b>Li<sub>4</sub>Sn<sub>1</sub></b><br><br>(R $\bar{3}$ m) | a =4.742                                                                                   | Li(6c)              | 0.00000 | 0.00000 | 0.20553 | +0.82         |
|                                                             | c =8.501                                                                                   | Li(1b)              | 0.00000 | 0.00000 | 0.50000 | +0.82      |                                                            | c =13.932                                                                                  | Li(6c)              | 0.00000 | 0.00000 | 0.60845 | +0.82         |
|                                                             |                                                                                            | Li(2d)              | 0.33333 | 0.66667 | 0.07672 | +0.82      |                                                            |                                                                                            | Sn(3a)              | 0.00000 | 0.00000 | 0.00000 | -3.28         |
|                                                             |                                                                                            | Li(2c)              | 0.00000 | 0.00000 | 0.17809 | +0.82      |                                                            |                                                                                            |                     |         |         |         |               |
|                                                             |                                                                                            | Sn(2d)              | 0.33333 | 0.66667 | 0.73685 | -2.88      |                                                            |                                                                                            |                     |         |         |         |               |



Table T4: Crystal structures of selective Li-Sn compounds at 20 GPa and the corresponding atomic Bader charges (Q).

| Stoichiometry<br>(Space Group)                              | Lattice parameters<br>(a, b, and c in Å)<br>( $\alpha, \beta$ , and $\gamma$ in degree) | Wyckoff<br>position | X       | Y       | Z       | Q<br>( e ) | Stoichiometry<br>(Space Group)                            | Lattice parameters<br>(a, b, c in Å)<br>( $\alpha, \beta$ , and $\gamma$ in degree) | Wyckoff<br>position | X       | Y       | Z       | Q<br>( e ) |
|-------------------------------------------------------------|-----------------------------------------------------------------------------------------|---------------------|---------|---------|---------|------------|-----------------------------------------------------------|-------------------------------------------------------------------------------------|---------------------|---------|---------|---------|------------|
| <b>Li<sub>2</sub>Sn<sub>5</sub></b><br><br>(Pbam)           | a =10.090                                                                               | Li(4h)              | 0.18904 | 0.65289 | 0.50000 | +0.82      | <b>Li<sub>7</sub>Sn<sub>1</sub></b><br><br>(P $\bar{1}$ ) | a =4.609                                                                            | Li(2i)              | 0.08982 | 0.94209 | 0.26804 | +0.76      |
|                                                             | b =8.955                                                                                | Sn(4g)              | 0.05605 | 0.17532 | 0.00000 | -0.14      |                                                           | b =6.693                                                                            | Li(2i)              | 0.02194 | 0.27539 | 0.94230 | -0.79      |
|                                                             | c =2.885                                                                                | Sn(4g)              | 0.77653 | 0.09349 | 0.00000 | -0.44      |                                                           | c =6.697                                                                            | Li(2i)              | 0.43336 | 0.28740 | 0.69773 | +0.76      |
|                                                             |                                                                                         | Sn(2c)              | 0.00000 | 0.50000 | 0.00000 | -0.47      |                                                           | $\alpha$ =67.57                                                                     | Li(2i)              | 0.70764 | 0.88964 | 0.54725 | +0.76      |
| <b>Li<sub>1</sub>Sn<sub>1</sub></b><br><br>(Pm $\bar{3}$ m) | a =3.135                                                                                | Li(1a)              | 0.00000 | 0.00000 | 0.00000 | +0.81      | <b>Li<sub>4</sub>Sn<sub>1</sub></b><br><br>(I4/m)         | a =11.965<br><br>c =4.241                                                           | Li(2i)              | 0.68061 | 0.59950 | 0.91842 | +0.76      |
|                                                             |                                                                                         | Sn(1b)              | 0.50000 | 0.50000 | 0.50000 | -0.81      |                                                           |                                                                                     | Li(2i)              | 0.20320 | 0.50876 | 0.38472 | +0.76      |
| <b>Li<sub>3</sub>Sn<sub>1</sub></b><br><br>(Fm $\bar{3}$ m) | a =5.867                                                                                |                     |         |         |         |            |                                                           |                                                                                     | Li(2i)              | 0.37276 | 0.91514 | 0.90975 | +0.68      |
|                                                             |                                                                                         |                     |         |         |         |            |                                                           |                                                                                     | Sn(2i)              | 0.22474 | 0.68709 | 0.68152 | -3.69      |
|                                                             |                                                                                         | Li(8c)              | 0.25000 | 0.25000 | 0.25000 | +0.80      |                                                           |                                                                                     | Li(8h)              | 0.38249 | 0.55903 | 0.00000 | +0.78      |
|                                                             |                                                                                         | Li(4a)              | 0.00000 | 0.00000 | 0.00000 | +0.78      |                                                           |                                                                                     | Li(8h)              | 0.76672 | 0.61477 | 0.00000 | +0.78      |
|                                                             |                                                                                         | Sn(4b)              | 0.50000 | 0.50000 | 0.50000 | -2.35      |                                                           |                                                                                     | Li(8h)              | 0.04345 | 0.41742 | 0.00000 | +0.78      |
|                                                             |                                                                                         |                     |         |         |         |            |                                                           |                                                                                     | Li(8h)              | 0.82836 | 0.80087 | 0.00000 | +0.78      |
|                                                             |                                                                                         |                     |         |         |         |            |                                                           |                                                                                     | Li(8h)              | 0.76776 | 0.98727 | 0.00000 | +0.78      |
|                                                             |                                                                                         |                     |         |         |         |            |                                                           |                                                                                     | Sn(2b)              | 0.00000 | 0.00000 | 0.00000 | -3.38      |
|                                                             |                                                                                         |                     |         |         |         |            |                                                           |                                                                                     | Sn(8h)              | 0.61033 | 0.81763 | 0.00000 | -3.04      |

Table T5: The space group and calculated equilibrium lattice parameters  $a$  (Å),  $b$  (Å), and  $c$  (Å),  $\alpha$ (deg),  $\beta$ (deg),  $\gamma$ (deg), and volume (Å<sup>3</sup>/atom), at given pressure for Li, Sn and Li-Sn compounds are given. Gravimetric capacities of corresponding Li-Sn compounds are written in first column, in parenthesis.

| System (GC)                                       | Pressure | Space                      | a      | b      | c      | $\alpha$ | $\beta$ | $\gamma$ | Volume                 | System (GC)                                       | Pressure | Space                | a      | b      | c      | $\alpha$ | $\beta$ | $\gamma$ | Volume                 |
|---------------------------------------------------|----------|----------------------------|--------|--------|--------|----------|---------|----------|------------------------|---------------------------------------------------|----------|----------------------|--------|--------|--------|----------|---------|----------|------------------------|
| (mAh/g)                                           |          | Group (f.u.)               | (Å)    | (Å)    | (Å)    | (°)      | (°)     | (°)      | (Å <sup>3</sup> /atom) | (mAh/g)                                           |          | Group (f.u.)         | (Å)    | (Å)    | (Å)    | (°)      | (°)     | (°)      | (Å <sup>3</sup> /atom) |
| <b>Sn</b><br><br>(-)                              | 1 atm    | F $\bar{4}3m$ (Z=8)        | 6.651  | 6.651  | 6.651  | 90.00    | 90.00   | 90.00    | 36.78                  | <b>Li</b><br><br>(-)                              | 1 atm    | Im $\bar{3}m$ (Z=2)  | 3.439  | 3.439  | 3.439  | 90.00    | 90.00   | 90.00    | 20.33                  |
|                                                   | 5 GPa    | I4 <sub>1</sub> /amd(Z=4)  | 5.948  | 5.948  | 3.201  | 90.00    | 90.00   | 90.00    | 28.31                  |                                                   | 5 GPa    | Im $\bar{3}m$ (Z=2)  | 3.175  | 3.175  | 3.175  | 90.00    | 90.00   | 90.00    | 16.00                  |
|                                                   | 10 GPa   | I4/mmm(Z=2)                | 3.778  | 3.778  | 3.349  | 90.00    | 90.00   | 90.00    | 23.91                  |                                                   | 10 GPa   | Fm $\bar{3}m$ (Z=4)  | 3.814  | 3.814  | 3.814  | 90.00    | 90.00   | 90.00    | 13.87                  |
|                                                   | 20 GPa   | I4/mmm(Z=2)                | 3.647  | 3.647  | 3.285  | 90.00    | 90.00   | 90.00    | 21.84                  |                                                   | 20 GPa   | Fm $\bar{3}m$ (Z=4)  | 3.591  | 3.591  | 3.591  | 90.00    | 90.00   | 90.00    | 11.57                  |
|                                                   |          |                            |        |        |        |          |         |          |                        |                                                   |          |                      |        |        |        |          |         |          |                        |
| <b>Li<sub>2</sub>Sn<sub>5</sub></b><br><br>(90)   | 1 atm    | P4/mbm(Z=2)                | 10.378 | 10.378 | 3.141  | 90.00    | 90.00   | 90.00    | 24.17                  | <b>Li<sub>7</sub>Sn<sub>1</sub></b><br><br>(1580) | 1 atm    | C2/m(Z=4)            | 15.678 | 4.826  | 8.058  | 90.00    | 102.67  | 90.00    | 18.59                  |
|                                                   | 5 GPa    | Pbam(Z=2)                  | 10.365 | 9.745  | 3.045  | 90.00    | 90.00   | 90.00    | 21.97                  |                                                   | 5 GPa    | C2/m(Z=4)            | 14.762 | 4.556  | 7.598  | 90.00    | 102.40  | 90.00    | 15.60                  |
|                                                   | 10 GPa   | Pbam(Z=2)                  | 10.247 | 9.407  | 2.981  | 90.00    | 90.00   | 90.00    | 20.52                  |                                                   | 10 GPa   | C2/m(Z=4)            | 14.208 | 4.392  | 7.324  | 90.00    | 102.14  | 90.00    | 13.96                  |
|                                                   | 20 GPa   | Pbam(Z=2)                  | 10.090 | 8.955  | 2.885  | 90.00    | 90.00   | 90.00    | 18.62                  |                                                   | 20 GPa   | F $\bar{1}$ (Z=2)    | 4.609  | 6.693  | 6.697  | 67.57    | 79.92   | 80.25    | 11.68                  |
| <b>Li<sub>1</sub>Sn<sub>1</sub></b><br><br>(226)  | 1 atm    | P2/m(Z=3)                  | 5.178  | 3.225  | 7.812  | 90.00    | 105.25  | 90.00    | 20.98                  | <b>Li<sub>5</sub>Sn<sub>1</sub></b><br><br>(1129) | 1 atm    | C2/m(Z=8)            | 15.918 | 5.738  | 12.043 | 90.00    | 128.86  | 90.00    | 17.84                  |
|                                                   |          | I4 <sub>1</sub> /amd(Z=12) | 4.454  | 4.454  | 26.043 | 90.00    | 90.00   | 90.00    | 21.53                  |                                                   | 5 GPa    | C2/m(Z=8)            | 15.135 | 5.474  | 11.453 | 90.00    | 128.87  | 90.00    | 15.39                  |
|                                                   | 5 GPa    | P2/m(Z=3)                  | 4.940  | 3.145  | 7.526  | 90.00    | 106.18  | 90.00    | 18.72                  |                                                   | 10 GPa   | C2/m(Z=8)            | 14.631 | 5.308  | 11.076 | 90.00    | 128.83  | 90.00    | 13.96                  |
|                                                   | 10 GPa   | Pn $\bar{3}m$ (Z=1)        | 3.248  | 3.248  | 3.248  | 90.00    | 90.00   | 90.00    | 17.14                  |                                                   | 20 GPa   | C2/m(Z=8)            | 13.948 | 5.089  | 10.568 | 90.00    | 128.71  | 90.00    | 12.20                  |
|                                                   | 20 GPa   | Pn $\bar{3}m$ (Z=1)        | 3.135  | 3.135  | 3.135  | 90.00    | 90.00   | 90.00    | 15.41                  |                                                   |          |                      |        |        |        |          |         |          |                        |
| <b>Li<sub>7</sub>Sn<sub>3</sub></b><br><br>(527)  | 1 atm    | P2 <sub>1</sub> /m(Z=2)    | 8.562  | 4.738  | 9.491  | 90.00    | 106.10  | 90.00    | 18.50                  | <b>Li<sub>17</sub>Sn<sub>4</sub></b><br><br>(960) | 1 atm    | F $\bar{4}3m$ (Z=20) | 19.714 | 19.714 | 19.714 | 90.00    | 90.00   | 90.00    | 18.24                  |
|                                                   | 5 GPa    | P2 <sub>1</sub> /m(Z=2)    | 8.225  | 4.528  | 9.092  | 90.00    | 106.07  | 90.00    | 16.27                  |                                                   | 5 GPa    | F $\bar{4}3m$ (Z=20) | 18.789 | 18.789 | 18.789 | 90.00    | 90.00   | 90.00    | 15.79                  |
|                                                   | 10 GPa   | P2 <sub>1</sub> /m(Z=2)    | 8.009  | 4.387  | 8.341  | 90.00    | 106.05  | 90.00    | 14.91                  |                                                   | 10 GPa   | F $\bar{4}3m$ (Z=20) | 18.198 | 18.198 | 18.198 | 90.00    | 90.00   | 90.00    | 14.35                  |
|                                                   | 20 GPa   | P2 <sub>1</sub> /m(z=2)    | 7.710  | 4.196  | 8.489  | 90.00    | 106.03  | 90.00    | 13.20                  |                                                   | 20 GPa   | F $\bar{4}3m$ (Z=20) | 17.398 | 17.398 | 17.398 | 90.00    | 90.00   | 90.00    | 12.54                  |
| <b>Li<sub>5</sub>Sn<sub>2</sub></b><br><br>(564)  | 1 atm    | R $\bar{3}m$ (Z=3)         | 4.732  | 4.732  | 19.810 | 90.00    | 90.00   | 120.00   | 18.29                  | <b>Li<sub>4</sub>Sn<sub>1</sub></b><br><br>(903)  | 1 atm    | R $\bar{3}m$ (Z=3)   | 4.742  | 4.742  | 13.932 | 90.00    | 90.00   | 120.00   | 18.08                  |
|                                                   | 5 GPa    | R $\bar{3}m$ (Z=3)         | 4.520  | 4.520  | 19.079 | 90.00    | 90.00   | 120.00   | 16.07                  |                                                   | 5 GPa    | R $\bar{3}m$ (Z=3)   | 4.524  | 4.524  | 13.173 | 90.00    | 90.00   | 120.00   | 15.57                  |
|                                                   | 10 GPa   | R $\bar{3}m$ (Z=3)         | 4.376  | 4.376  | 18.629 | 90.00    | 90.00   | 120.00   | 14.72                  |                                                   | 10 GPa   | R $\bar{3}m$ (Z=3)   | 4.386  | 4.386  | 12.701 | 90.00    | 90.00   | 120.00   | 14.11                  |
|                                                   | 20 GPa   | R $\bar{3}m$ (Z=3)         | 4.187  | 4.187  | 17.994 | 90.00    | 90.00   | 120.00   | 13.01                  |                                                   | 20 GPa   | I4/m(Z=10)           | 11.965 | 11.965 | 4.241  | 90.00    | 90.00   | 90.00    | 12.14                  |
| <b>Li<sub>13</sub>Sn<sub>5</sub></b><br><br>(587) | 1 atm    | P $\bar{3}m$ 1(Z=1)        | 4.702  | 4.702  | 17.133 | 90.00    | 90.00   | 120.00   | 18.23                  | <b>Li<sub>7</sub>Sn<sub>2</sub></b><br><br>(790)  | 1 atm    | P $\bar{3}m$ 1(Z=1)  | 4.681  | 4.681  | 8.501  | 90.00    | 90.00   | 120.00   | 17.93                  |
|                                                   |          |                            |        |        |        |          |         |          |                        |                                                   |          | Cmmm(Z=4)            | 9.812  | 13.887 | 4.728  | 90.00    | 90.00   | 90.00    | 17.90                  |
|                                                   | 5 GPa    | P $\bar{3}m$ 1(Z=1)        | 4.495  | 4.495  | 16.458 | 90.00    | 90.00   | 120.00   | 16.00                  |                                                   | 5 GPa    | P $\bar{3}m$ 1(Z=1)  | 4.476  | 4.476  | 8.088  | 90.00    | 90.00   | 120.00   | 15.59                  |
|                                                   | 10 GPa   | P $\bar{3}m$ 1(Z=1)        | 4.358  | 4.358  | 16.020 | 90.00    | 90.00   | 120.00   | 14.64                  |                                                   | 10 GPa   | P $\bar{3}m$ 1(Z=1)  | 4.341  | 4.341  | 7.828  | 90.00    | 90.00   | 120.00   | 14.20                  |
| <b>Li<sub>8</sub>Sn<sub>3</sub></b><br><br>(602)  | 20 GPa   | P $\bar{3}m$ 1(Z=1)        | 4.173  | 4.173  | 15.433 | 90.00    | 90.00   | 120.00   | 12.93                  |                                                   | 20 GPa   | P $\bar{3}m$ 1(Z=1)  | 4.160  | 4.160  | 7.485  | 90.00    | 90.00   | 120.00   | 12.46                  |
|                                                   | 1 atm    | R $\bar{3}m$ (Z=3)         | 4.684  | 4.684  | 31.582 | 90.00    | 90.00   | 120.00   | 18.18                  | <b>Li<sub>3</sub>Sn<sub>1</sub></b><br><br>(677)  | 1 atm    | P2/m(Z=3)            | 6.885  | 4.623  | 7.060  | 90.00    | 104.07  | 90.00    | 18.16                  |
|                                                   | 5 GPa    | R $\bar{3}m$ (Z=3)         | 4.478  | 4.478  | 30.298 | 90.00    | 90.00   | 120.00   | 15.94                  |                                                   | 5 GPa    | Fm $\bar{3}m$ (Z=4)  | 6.305  | 6.305  | 6.305  | 90.00    | 90.00   | 90.00    | 15.67                  |
|                                                   | 10 GPa   | R $\bar{3}m$ (Z=3)         | 4.343  | 4.343  | 29.462 | 90.00    | 90.00   | 120.00   | 14.58                  |                                                   | 10 GPa   | Fm $\bar{3}m$ (Z=4)  | 6.119  | 6.119  | 6.119  | 90.00    | 90.00   | 90.00    | 14.32                  |
|                                                   | 20 GPa   | R $\bar{3}m$ (Z=3)         | 4.161  | 4.161  | 28.337 | 9000     | 90.00   | 120.00   | 12.87                  |                                                   | 20 GPa   | Fm $\bar{3}m$ (Z=4)  | 5.867  | 5.867  | 5.867  | 90.00    | 90.00   | 90.00    | 12.62                  |

## 8. Shortest interatomic distance for Li-Sn compounds

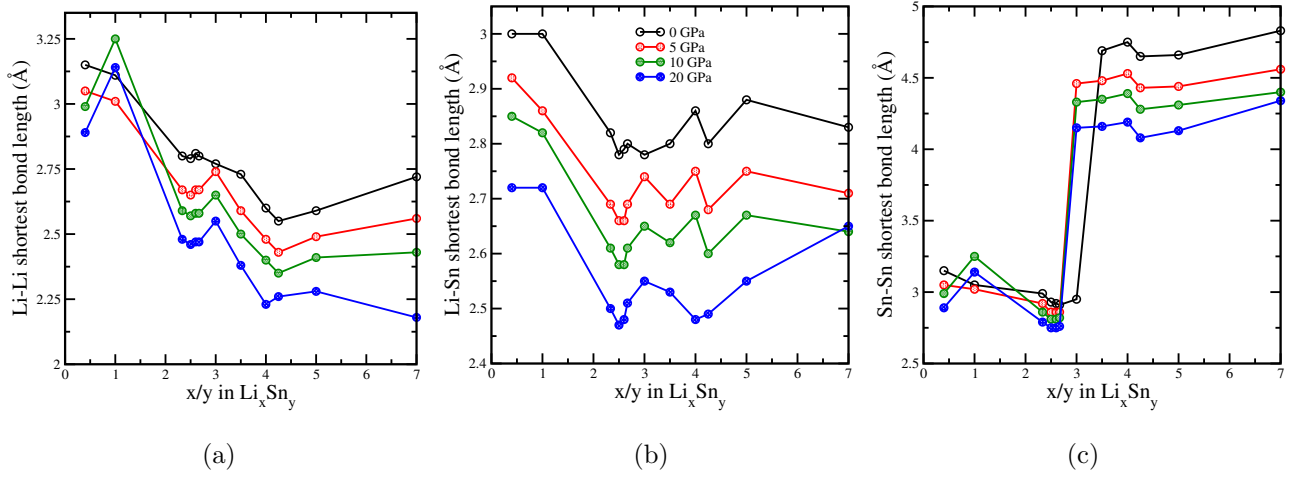

Figure S8: The shortest: (a) Li-Li, (b) Li-Sn, and (c) Sn-Sn, distance for Li-Sn compounds at 1 atm, 5GPa, 10GPa, and 20 GPa pressure.

Table T6: The shortest Li-Li, Li-Sn, and Sn-Sn distance for Li-Sn compounds at 1 atm, 5GPa, 10GPa, and 20 GPa pressure.

| Stoichiometry                    | The shortest atom-atom distance for Li-Sn compounds. (Å) |       |       |       |                    |       |       |       |                    |       |       |       |                    |       |       |       |
|----------------------------------|----------------------------------------------------------|-------|-------|-------|--------------------|-------|-------|-------|--------------------|-------|-------|-------|--------------------|-------|-------|-------|
|                                  | P = 1 atm                                                |       |       |       | P = 5 GPa          |       |       |       | P = 10 GPa         |       |       |       | P = 20 GPa         |       |       |       |
|                                  | Symmetry                                                 | Li-Li | Li-Sn | Sn-Sn | Symmetry           | Li-Li | Li-Sn | Sn-Sn | Symmetry           | Li-Li | Li-Sn | Sn-Sn | Symmetry           | Li-Li | Li-Sn | Sn-Sn |
| Li <sub>2</sub> Sn <sub>5</sub>  | P4/mbm                                                   | 3.14  | 3.00  | 3.14  | Pbam               | 3.05  | 2.92  | 3.05  | Pbam               | 2.99  | 2.85  | 2.99  | Pbam               | 2.89  | 2.72  | 2.89  |
| Li <sub>1</sub> Sn <sub>1</sub>  | P2/m                                                     | 3.11  | 3.00  | 3.05  | P2/m               | 3.01  | 2.86  | 3.02  | Pm $\bar{3}$ m     | 3.25  | 2.82  | 3.25  | Pm $\bar{3}$ m     | 3.14  | 2.72  | 3.14  |
|                                  | I4 <sub>1</sub> /amd                                     | 2.99  | 3.06  | 3.06  |                    |       |       |       |                    |       |       |       |                    |       |       |       |
| Li <sub>7</sub> Sn <sub>3</sub>  | P2 <sub>1</sub> /m                                       | 2.80  | 2.82  | 2.99  | P2 <sub>1</sub> /m | 2.67  | 2.69  | 2.92  | P2 <sub>1</sub> /m | 2.59  | 2.61  | 2.86  | P2 <sub>1</sub> /m | 2.48  | 2.50  | 2.79  |
| Li <sub>5</sub> Sn <sub>2</sub>  | R $\bar{3}$ m                                            | 2.79  | 2.78  | 2.93  | R $\bar{3}$ m      | 2.65  | 2.66  | 2.86  | R $\bar{3}$ m      | 2.57  | 2.58  | 2.81  | R $\bar{3}$ m      | 2.46  | 2.47  | 2.75  |
| Li <sub>13</sub> Sn <sub>5</sub> | P $\bar{3}$ m1                                           | 2.81  | 2.79  | 2.92  | P $\bar{3}$ m1     | 2.67  | 2.66  | 2.86  | P $\bar{3}$ m1     | 2.58  | 2.58  | 2.81  | P $\bar{3}$ m1     | 2.47  | 2.48  | 2.75  |
| Li <sub>8</sub> Sn <sub>3</sub>  | R $\bar{3}$ m                                            | 2.80  | 2.80  | 2.91  | R $\bar{3}$ m      | 2.67  | 2.69  | 2.86  | R $\bar{3}$ m      | 2.58  | 2.61  | 2.82  | R $\bar{3}$ m      | 2.47  | 2.51  | 2.76  |
| Li <sub>3</sub> Sn <sub>1</sub>  | P2/m                                                     | 2.77  | 2.78  | 2.95  | Fm $\bar{3}$ m     | 2.74  | 2.74  | 4.46  | Fm $\bar{3}$ m     | 2.65  | 2.65  | 4.33  | Fm $\bar{3}$ m     | 2.55  | 2.55  | 4.15  |
| Li <sub>7</sub> Sn <sub>2</sub>  | P $\bar{3}$ m1                                           | 2.73  | 2.80  | 4.69  | P $\bar{3}$ m1     | 2.59  | 2.69  | 4.48  | P $\bar{3}$ m1     | 2.50  | 2.62  | 4.35  | P $\bar{3}$ m1     | 2.38  | 2.53  | 4.16  |
|                                  | Cmmm                                                     | 2.70  | 2.84  | 3.21  |                    |       |       |       |                    |       |       |       |                    |       |       |       |
| Li <sub>4</sub> Sn <sub>1</sub>  | R $\bar{3}$ m                                            | 2.60  | 2.86  | 4.75  | R $\bar{3}$ m      | 2.48  | 2.75  | 4.53  | R $\bar{3}$ m      | 2.40  | 2.67  | 4.39  | I4/m               | 2.23  | 2.48  | 4.19  |
| Li <sub>17</sub> Sn <sub>4</sub> | F $\bar{4}$ 3m                                           | 2.55  | 2.80  | 4.65  | F $\bar{4}$ 3m     | 2.43  | 2.68  | 4.43  | F $\bar{4}$ 3m     | 2.35  | 2.60  | 4.28  | F $\bar{4}$ 3m     | 2.26  | 2.49  | 4.08  |
| Li <sub>5</sub> Sn <sub>1</sub>  | C2/m                                                     | 2.59  | 2.88  | 4.66  | C2/m               | 2.49  | 2.75  | 4.44  | C2/m               | 2.41  | 2.67  | 4.31  | C2/m               | 2.28  | 2.55  | 4.13  |
| Li <sub>7</sub> Sn <sub>1</sub>  | C2/m                                                     | 2.72  | 2.83  | 4.83  | C2/m               | 2.56  | 2.71  | 4.56  | C2/m               | 2.43  | 2.64  | 4.40  | P $\bar{1}$        | 2.18  | 2.65  | 4.34  |

## 9. Thermodynamic stability of $\text{Li}_3\text{Sn}_1$

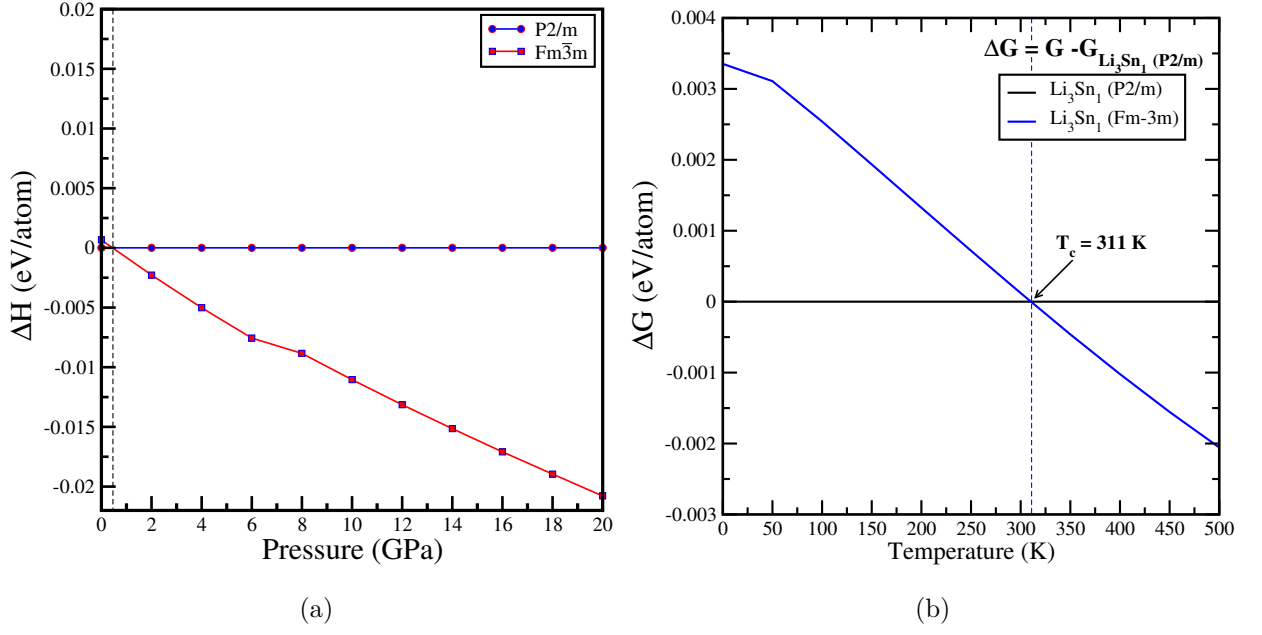

Figure S9: Thermodynamic stability of  $\text{Li}_3\text{Sn}_1$ . (a) Pressure driven  $\text{P2/m}$  to  $\text{Pm}\bar{3}\text{m}$  phase transition of  $\text{Li}_3\text{Sn}_1$ , (b) Temperature driven  $\text{P2/m}$  to  $\text{Pm}\bar{3}\text{m}$  phase transition of  $\text{Li}_3\text{Sn}_1$  is shown.

## 10. Thermodynamic stability of $\text{Li}_4\text{Sn}_1$

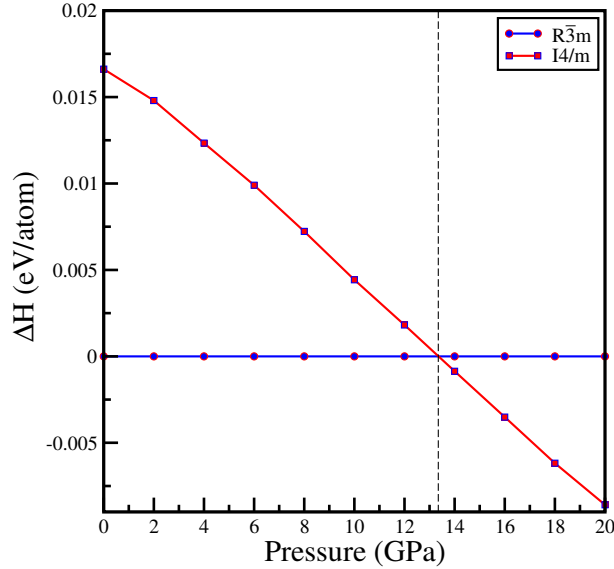

Figure S10: Thermodynamic stability of  $\text{Li}_4\text{Sn}_1$ . Pressure driven  $\text{R}\bar{3}\text{m}$  to  $\text{I4/m}$  phase transition of  $\text{Li}_4\text{Sn}_1$  is shown.

## 11. Thermodynamic stability of $\text{Li}_7\text{Sn}_1$

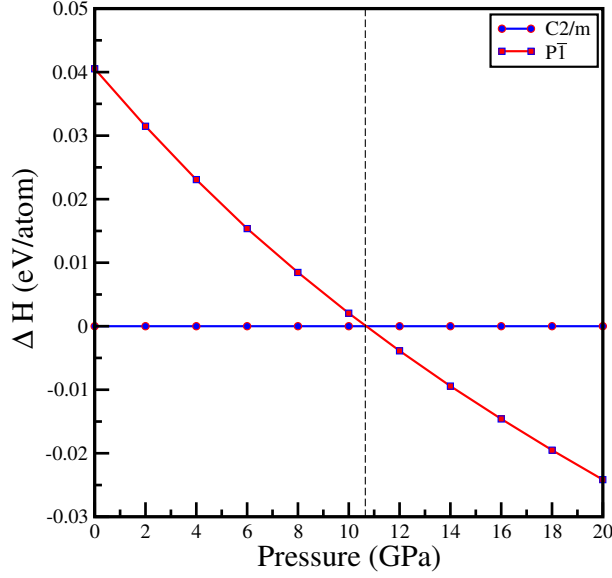

Figure S11: Thermodynamic stability of  $\text{Li}_7\text{Sn}_1$ . Pressure driven  $\text{C2/m}$  to  $\text{P1}$  phase transition of  $\text{Li}_7\text{Sn}_1$  is shown.

## 12. Mechanical properties of Li-Sn compounds

The continuum model based on Reuss and Voigt approaches are explicitly used for studies of  $B_R$ ,  $B_V$  and  $G_R$ ,  $G_V$  which are respectively the bulk modulus and shear modulus from the Reuss and Voigt approximations, can be expressed by the following equations:

$$B_R = [S_{11} + S_{22} + S_{33} + 2(S_{12} + S_{13} + S_{23})]^{-1} \quad (3)$$

$$B_V = \frac{1}{9}[C_{11} + C_{22} + C_{33} - 2(C_{12} + C_{13} + C_{23})] \quad (4)$$

$$G_R = 15[4(S_{11} + S_{22} + S_{33}) - 4(S_{12} + S_{13} + S_{23}) + 3(S_{44} + S_{55} + S_{66})]^{-1} \quad (5)$$

$$G_V = \frac{1}{15}[C_{11} + C_{22} + C_{33} - (C_{12} + C_{13} + C_{23}) + 3(C_{44} + C_{55} + C_{66})] \quad (6)$$

where,  $S_{ij}$  and  $C_{ij}$  are the single crystal elastic compliance constants and elastic stiffness constants, respectively.

Hill has proved that actual elastic moduli for polycrystals can be approximated from the arithmetic mean of Voigt and Reuss moduli which basically represent the

upper and lower limits of the true polycrystalline constants. We therefore move towards the Voigt-Reuss-Hill approximation[8] and express the bulk and shear modulus as follows:

$$B = \frac{1}{2}(B_V + B_R) \quad (7)$$

$$G = \frac{1}{2}(G_V + G_R) \quad (8)$$

After getting the value of B and G, Young's modulus (E) and Poisson's ratio ( $\nu$ ) can easily be determined using the following formula:

$$E = \frac{9BG}{3B + G} \quad (9)$$

$$\nu = \frac{3B - 2G}{2(3B + G)} \quad (10)$$

# 1. Elastic Constants of Li-Sn compounds.

Table T7: Elastic constants  $C_{ij}$  for Li, Sn, and Li-Sn compounds at 1 atm, where all quantities are in units of GPa.

| Elements    | Sn             | Li <sub>2</sub> Sn <sub>5</sub> | Li <sub>1</sub> Sn <sub>1</sub> |                      | Li <sub>7</sub> Sn <sub>3</sub> | Li <sub>5</sub> Sn <sub>2</sub> | Li <sub>13</sub> Sn <sub>5</sub> | Li <sub>8</sub> Sn <sub>3</sub> | Li <sub>3</sub> Sn <sub>1</sub> | Li <sub>7</sub> Sn <sub>2</sub> |       | Li <sub>4</sub> Sn <sub>1</sub> | Li <sub>7</sub> Sn <sub>1</sub> | Li <sub>5</sub> Sn <sub>1</sub> | Li             |
|-------------|----------------|---------------------------------|---------------------------------|----------------------|---------------------------------|---------------------------------|----------------------------------|---------------------------------|---------------------------------|---------------------------------|-------|---------------------------------|---------------------------------|---------------------------------|----------------|
| Space group | Fd $\bar{3}$ m | P4/mbm                          | P2/m                            | I4 <sub>1</sub> /amd | P2 <sub>1</sub> /m              | R $\bar{3}$ m                   | P $\bar{3}$ m1                   | R $\bar{3}$ m                   | P2/m                            | P $\bar{3}$ m1                  | Cmmm  | R $\bar{3}$ m                   | C2/m                            | C2/m                            | Im $\bar{3}$ m |
| $C_{ij}$    |                |                                 |                                 |                      |                                 |                                 |                                  |                                 |                                 |                                 |       |                                 |                                 |                                 |                |
| $C_{11}$    | 56.12          | 79.03                           | 65.99                           | 63.88                | 61.44                           | 73.02                           | 75.52                            | 72.51                           | 43.11                           | 69.69                           | 55.05 | 73.59                           | 56.62                           | 58.33                           | 15.09          |
| $C_{22}$    |                |                                 | 80.53                           |                      | 77.07                           |                                 |                                  |                                 | 67.09                           |                                 | 68.80 |                                 | 52.74                           | 65.85                           |                |
| $C_{33}$    |                | 95.24                           | 64.46                           | 65.53                | 82.62                           | 103.20                          | 110.90                           | 106.72                          | 68.17                           | 80.55                           | 77.40 | 75.37                           | 51.67                           | 45.84                           |                |
| $C_{44}$    | 43.26          | 19.85                           | 15.64                           | 28.13                | 8.94                            | 17.65                           | 20.03                            | 21.44                           | 15.41                           | 18.38                           | 12.21 | 8.40                            | 27.01                           | 16.74                           | 7.26           |
| $C_{55}$    |                |                                 | 18.25                           |                      | 36.99                           |                                 |                                  |                                 | 46.96                           |                                 | 33.82 |                                 | 27.84                           | 19.63                           |                |
| $C_{66}$    |                | 14.93                           | 16.17                           | 5.30                 | 36.25                           |                                 |                                  |                                 | 37.16                           |                                 | 39.75 |                                 | 21.15                           | 7.35                            |                |
| $C_{12}$    | 26.60          | 37.11                           | 12.50                           | 20.29                | 18.38                           | 11.13                           | 13.57                            | 15.12                           | 20.71                           | 16.10                           | 19.72 | 9.19                            | 9.14                            | -5.87                           | 13.38          |
| $C_{13}$    |                | 15.45                           | 29.89                           | 26.55                | 19.25                           | 2.68                            | -2.29                            | -1.29                           | 25.80                           | 0.57                            | 14.69 | 0.60                            | 11.85                           | 12.71                           |                |
| $C_{14}$    |                |                                 |                                 |                      |                                 | 12.49                           | 13.59                            | -14.23                          |                                 | 10.07                           |       | -9.28                           |                                 |                                 |                |
| $C_{15}$    |                |                                 | 2.65                            |                      | -14.08                          |                                 |                                  |                                 | -5.32                           |                                 |       |                                 | -3.94                           | 1.41                            |                |
| $C_{23}$    |                |                                 | 20.59                           |                      | -5.88                           |                                 |                                  |                                 | -1.43                           |                                 | -6.05 |                                 | 13.31                           | 6.65                            |                |
| $C_{25}$    |                |                                 | -2.39                           |                      | 7.43                            |                                 |                                  |                                 | -0.68                           |                                 |       |                                 | -2.82                           | 6.22                            |                |
| $C_{35}$    |                |                                 | -0.22                           |                      | 9.06                            |                                 |                                  |                                 | -1.78                           |                                 |       |                                 | 7.83                            | -8.10                           |                |
| $C_{46}$    |                |                                 | -0.48                           |                      | 8.28                            |                                 |                                  |                                 | -2.17                           |                                 |       |                                 | -4.06                           | 8.22                            |                |

Table T8: Elastic constants  $C_{ij}$  for Li, Sn, and Li-Sn compounds at 5 GPa, where all quantities are in units of GPa.

| Elements    | Sn                   | Li <sub>2</sub> Sn <sub>5</sub> | Li <sub>1</sub> Sn <sub>1</sub> | Li <sub>7</sub> Sn <sub>3</sub> | Li <sub>5</sub> Sn <sub>2</sub> | Li <sub>13</sub> Sn <sub>5</sub> | Li <sub>8</sub> Sn <sub>3</sub> | Li <sub>3</sub> Sn <sub>1</sub> | Li <sub>7</sub> Sn <sub>2</sub> | Li <sub>4</sub> Sn <sub>1</sub> | Li <sub>7</sub> Sn <sub>1</sub> | Li <sub>5</sub> Sn <sub>1</sub> | Li             |
|-------------|----------------------|---------------------------------|---------------------------------|---------------------------------|---------------------------------|----------------------------------|---------------------------------|---------------------------------|---------------------------------|---------------------------------|---------------------------------|---------------------------------|----------------|
| Space group | I4 <sub>1</sub> /amd | Pbam                            | P2/m                            | P2 <sub>1</sub> /m              | R $\bar{3}$ m                   | P $\bar{3}$ m1                   | R $\bar{3}$ m                   | Fm $\bar{3}$ m                  | P $\bar{3}$ m1                  | R $\bar{3}$ m                   | C2/m                            | C2/m                            | Im $\bar{3}$ m |
| $C_{ij}$    |                      |                                 |                                 |                                 |                                 |                                  |                                 |                                 |                                 |                                 |                                 |                                 |                |
| $C_{11}$    | 136.47               | 108.11                          | 94.03                           | 85.02                           | 102.99                          | 105.14                           | 102.43                          | 63.86                           | 100.06                          | 105.00                          | 90.56                           | 84.47                           | 26.68          |
| $C_{22}$    |                      | 102.94                          | 115.87                          | 104.56                          |                                 |                                  |                                 |                                 |                                 |                                 | 96.23                           | 96.99                           |                |
| $C_{33}$    | 128.01               | 129.68                          | 95.62                           | 121.81                          | 154.48                          | 155.03                           | 145.43                          |                                 | 111.01                          | 109.93                          | 86.07                           | 71.41                           |                |
| $C_{44}$    | 28.44                | 23.84                           | 27.09                           | 16.30                           | 27.50                           | 28.86                            | 30.34                           | 50.86                           | 24.59                           | 8.84                            | 29.37                           | 23.14                           | 24.13          |
| $C_{55}$    |                      | 25.79                           | 28.64                           | 52.58                           |                                 |                                  |                                 |                                 |                                 |                                 | 35.29                           | 28.17                           |                |
| $C_{66}$    | 17.06                | 29.78                           | 27.56                           | 50.07                           |                                 |                                  |                                 |                                 |                                 |                                 | 29.91                           | 12.72                           |                |
| $C_{12}$    | 24.19                | 49.15                           | 24.54                           | 31.71                           | 19.60                           | 23.14                            | 23.91                           | 33.78                           | 23.63                           | 18.60                           | 12.53                           | -2.30                           | 23.10          |
| $C_{13}$    | 38.90                | 25.24                           | 36.39                           | 28.37                           | 5.96                            | 1.44                             | 3.71                            |                                 | 7.05                            | 4.77                            | 14.88                           | 23.42                           |                |
| $C_{14}$    |                      |                                 |                                 |                                 | 16.68                           | 18.22                            | -18.50                          |                                 | 13.21                           | -12.31                          |                                 |                                 |                |
| $C_{15}$    |                      |                                 | -0.51                           | -20.57                          |                                 |                                  |                                 |                                 |                                 |                                 | 2.93                            | 1.51                            |                |
| $C_{23}$    |                      | 27.22                           | 30.55                           | -3.19                           |                                 |                                  |                                 |                                 |                                 |                                 | 16.57                           | 13.14                           |                |
| $C_{25}$    |                      |                                 | 0.90                            | 9.81                            |                                 |                                  |                                 |                                 |                                 |                                 | 3.20                            | 7.67                            |                |
| $C_{35}$    |                      |                                 | 2.54                            | 10.94                           |                                 |                                  |                                 |                                 |                                 |                                 | -6.16                           | -7.91                           |                |
| $C_{46}$    |                      |                                 | -0.18                           | 10.56                           |                                 |                                  |                                 |                                 |                                 |                                 | 1.85                            | 11.32                           |                |



Table T9: Elastic constants  $C_{ij}$  for Li, Sn, and Li-Sn compounds at 10 GPa, where all quantities are in units of GPa.

| Elements    | Sn     | Li <sub>2</sub> Sn <sub>5</sub> | Li <sub>1</sub> Sn <sub>1</sub> | Li <sub>7</sub> Sn <sub>3</sub> | Li <sub>5</sub> Sn <sub>2</sub> | Li <sub>13</sub> Sn <sub>5</sub> | Li <sub>8</sub> Sn <sub>3</sub> | Li <sub>3</sub> Sn <sub>1</sub> | Li <sub>7</sub> Sn <sub>2</sub> | Li <sub>4</sub> Sn <sub>1</sub> | Li <sub>7</sub> Sn <sub>1</sub> | Li <sub>5</sub> Sn <sub>1</sub> | Li             |
|-------------|--------|---------------------------------|---------------------------------|---------------------------------|---------------------------------|----------------------------------|---------------------------------|---------------------------------|---------------------------------|---------------------------------|---------------------------------|---------------------------------|----------------|
| Space group | I4/mmm | Pbam                            | Pm $\bar{3}$ m                  | P2 <sub>1</sub> /m              | R $\bar{3}$ m                   | P $\bar{3}$ m1                   | R $\bar{3}$ m                   | Fm $\bar{3}$ m                  | P $\bar{3}$ m1                  | R $\bar{3}$ m                   | C2/m                            | C2/m                            | Fm $\bar{3}$ m |
| $C_{ij}$    |        |                                 |                                 |                                 |                                 |                                  |                                 |                                 |                                 |                                 |                                 |                                 |                |
| $C_{11}$    | 91.87  | 132.32                          | 87.84                           | 103.81                          | 122.60                          | 129.33                           | 125.42                          | 74.30                           | 124.40                          | 129.67                          | 112.39                          | 116.65                          | 38.92          |
| $C_{22}$    |        | 137.88                          |                                 | 125.38                          |                                 |                                  |                                 |                                 |                                 |                                 | 117.74                          | 100.24                          |                |
| $C_{33}$    | 108.56 | 173.33                          |                                 | 148.21                          | 177.95                          | 187.43                           | 175.10                          |                                 | 138.07                          | 135.16                          | 105.51                          | 88.10                           |                |
| $C_{44}$    | 22.84  | 27.78                           | 43.50                           | 20.46                           | 34.65                           | 36.28                            | 36.91                           | 60.04                           | 30.50                           | 11.59                           | 35.74                           | 35.07                           | 13.96          |
| $C_{55}$    |        | 29.71                           |                                 | 62.87                           |                                 |                                  |                                 |                                 |                                 |                                 | 42.01                           | 29.21                           |                |
| $C_{66}$    | 47.00  | 33.19                           |                                 | 59.55                           |                                 |                                  |                                 |                                 |                                 |                                 | 36.81                           | 15.99                           |                |
| $C_{12}$    | 74.43  | 61.72                           | 56.54                           | 39.88                           | 25.15                           | 30.18                            | 30.88                           | 44.12                           | 31.27                           | 25.45                           | 19.65                           | 2.32                            | 30.93          |
| $C_{13}$    | 75.94  | 28.14                           |                                 | 35.55                           | 12.24                           | 6.08                             | 9.50                            |                                 | 11.48                           | 9.75                            | 20.94                           | 17.80                           |                |
| $C_{14}$    |        |                                 |                                 |                                 | 19.89                           | 21.94                            | -22.44                          |                                 | 15.09                           | -13.68                          |                                 |                                 |                |
| $C_{15}$    |        |                                 |                                 | 24.17                           |                                 |                                  |                                 |                                 |                                 |                                 | 3.57                            | -2.77                           |                |
| $C_{23}$    |        | 29.90                           |                                 | -1.60                           |                                 |                                  |                                 |                                 |                                 |                                 | 24.88                           | 31.51                           |                |
| $C_{25}$    |        |                                 |                                 | -11.83                          |                                 |                                  |                                 |                                 |                                 |                                 | 3.97                            | 2.03                            |                |
| $C_{35}$    |        |                                 |                                 | -12.09                          |                                 |                                  |                                 |                                 |                                 |                                 | -8.06                           | 1.01                            |                |
| $C_{46}$    |        |                                 |                                 | -12.44                          |                                 |                                  |                                 |                                 |                                 |                                 | 1.91                            | 1.09                            |                |

Table T10: Elastic constants  $C_{ij}$  for Li, Sn, and Li-Sn compounds at 20 GPa, where all quantities are in units of GPa.

| Elements    | Sn     | Li <sub>2</sub> Sn <sub>5</sub> | Li <sub>1</sub> Sn <sub>1</sub> | Li <sub>7</sub> Sn <sub>3</sub> | Li <sub>5</sub> Sn <sub>2</sub> | Li <sub>13</sub> Sn <sub>5</sub> | Li <sub>8</sub> Sn <sub>3</sub> | Li <sub>3</sub> Sn <sub>1</sub> | Li <sub>7</sub> Sn <sub>2</sub> | Li <sub>4</sub> Sn <sub>1</sub> | Li <sub>7</sub> Sn <sub>1</sub> | Li <sub>5</sub> Sn <sub>1</sub> | Li             |
|-------------|--------|---------------------------------|---------------------------------|---------------------------------|---------------------------------|----------------------------------|---------------------------------|---------------------------------|---------------------------------|---------------------------------|---------------------------------|---------------------------------|----------------|
| Space group | I4/mmm | Pbam                            | Pm $\bar{3}$ m                  | P2 <sub>1</sub> /m              | R $\bar{3}$ m                   | P $\bar{3}$ m1                   | R $\bar{3}$ m                   | Fm $\bar{3}$ m                  | P $\bar{3}$ m1                  | I4/m                            | C2/m                            | P $\bar{1}$                     | Fm $\bar{3}$ m |
| $C_{ij}$    |        |                                 |                                 |                                 |                                 |                                  |                                 |                                 |                                 |                                 |                                 |                                 |                |
| $C_{11}$    | 136.61 | 182.52                          | 125.83                          | 141.97                          | 164.34                          | 166.65                           | 161.74                          | 101.72                          | 163.71                          | 164.88                          | 155.79                          | 136.58                          | 56.84          |
| $C_{22}$    |        | 192.01                          |                                 | 166.79                          |                                 |                                  |                                 |                                 |                                 |                                 | 163.90                          | 123.70                          |                |
| $C_{33}$    | 143.10 | 228.71                          |                                 | 201.32                          | 239.79                          | 236.91                           | 221.78                          |                                 | 181.44                          | 184.76                          | 150.01                          | 114.85                          |                |
| $C_{44}$    | 45.16  | 35.11                           | 59.24                           | 29.73                           | 47.08                           | 47.86                            | 47.77                           | 76.81                           | 40.09                           | 58.37                           | 57.32                           | 53.58                           | 14.02          |
| $C_{55}$    |        | 35.79                           |                                 | 82.78                           |                                 |                                  |                                 |                                 |                                 |                                 | 57.85                           | 45.55                           |                |
| $C_{66}$    | 71.42  | 40.56                           |                                 | 78.94                           |                                 |                                  |                                 |                                 |                                 | 33.65                           | 43.40                           | 48.02                           |                |
| $C_{12}$    | 97.25  | 75.59                           | 76.56                           | 57.24                           | 39.46                           | 42.57                            | 45.54                           | 63.28                           | 43.53                           | 22.99                           | 18.42                           | 26.17                           | 46.90          |
| $C_{13}$    | 105.69 | 47.66                           |                                 | 49.98                           | 19.90                           | 15.26                            | 18.27                           |                                 | 18.83                           | 26.12                           | 35.43                           | 38.15                           |                |
| $C_{14}$    |        |                                 |                                 |                                 | 25.61                           | 27.68                            | 28.75                           |                                 | 18.20                           |                                 |                                 | 2.96                            |                |
| $C_{15}$    |        |                                 |                                 | -30.63                          |                                 |                                  |                                 |                                 |                                 |                                 | -2.05                           | 2.76                            |                |
| $C_{16}$    |        |                                 |                                 |                                 |                                 |                                  |                                 |                                 |                                 | -11.02                          |                                 | 6.81                            |                |
| $C_{23}$    |        | 48.01                           |                                 | 3.45                            |                                 |                                  |                                 |                                 |                                 |                                 | 32.32                           | 45.57                           |                |
| $C_{24}$    |        |                                 |                                 |                                 |                                 |                                  |                                 |                                 |                                 |                                 |                                 | 4.23                            |                |
| $C_{25}$    |        |                                 |                                 | 15.55                           |                                 |                                  |                                 |                                 |                                 |                                 | -2.36                           | -2.57                           |                |
| $C_{26}$    |        |                                 |                                 |                                 |                                 |                                  |                                 |                                 |                                 |                                 |                                 | 1.04                            |                |
| $C_{34}$    |        |                                 |                                 |                                 |                                 |                                  |                                 |                                 |                                 |                                 |                                 | -4.65                           |                |
| $C_{35}$    |        |                                 |                                 | 14.49                           |                                 |                                  |                                 |                                 |                                 |                                 | 6.41                            | -0.14                           |                |
| $C_{36}$    |        |                                 |                                 |                                 |                                 |                                  |                                 |                                 |                                 |                                 |                                 | -5.27                           |                |
| $C_{45}$    |        |                                 |                                 |                                 |                                 |                                  |                                 |                                 |                                 |                                 |                                 | -0.01                           |                |
| $C_{46}$    |        |                                 |                                 | 16.04                           |                                 |                                  |                                 |                                 |                                 |                                 | 1.94                            | -0.89                           |                |
| $C_{56}$    |        |                                 |                                 |                                 |                                 |                                  |                                 |                                 |                                 |                                 |                                 | 5.20                            |                |

2. Calculated shear modulus (G), bulk modulus (B), Young's modulus (Y) and Poisson's ratio ( $\nu$ ) for Li, Sn, and Li-Sn compounds

Table T11: Shear modulus (G), Bulk modulus (B), Young's modulus (Y) and Poisson's ratio ( $\nu$ ) for Li, Sn, and Li-Sn compounds at 1 atm. Except for  $\nu$ , all quantities are in units of GPa.

| Elements    |                                | Sn             | Li <sub>2</sub> Sn <sub>5</sub> | Li <sub>1</sub> Sn <sub>1</sub> |                      | Li <sub>7</sub> Sn <sub>3</sub> | Li <sub>5</sub> Sn <sub>2</sub> | Li <sub>13</sub> Sn <sub>5</sub> | Li <sub>8</sub> Sn <sub>3</sub> | Li <sub>3</sub> Sn <sub>1</sub> | Li <sub>7</sub> Sn <sub>2</sub> |       | Li <sub>4</sub> Sn <sub>1</sub> | Li <sub>7</sub> Sn <sub>1</sub> | Li <sub>5</sub> Sn <sub>1</sub> | Li             |
|-------------|--------------------------------|----------------|---------------------------------|---------------------------------|----------------------|---------------------------------|---------------------------------|----------------------------------|---------------------------------|---------------------------------|---------------------------------|-------|---------------------------------|---------------------------------|---------------------------------|----------------|
| Space group |                                | Fd $\bar{3}$ m | P4/mbm                          | P2/m                            | I4 <sub>1</sub> /amd | P2 <sub>1</sub> /m              | R $\bar{3}$ m                   | P $\bar{3}$ m1                   | R $\bar{3}$ m                   | P2/m                            | P $\bar{3}$ m1                  | Cmmm  | R $\bar{3}$ m                   | C2/m                            | C2/m                            | Im $\bar{3}$ m |
| B           | This work                      | 36.44          | 43.24                           | 37.40                           | 37.72                | 31.53                           | 31.17                           | 30.97                            | 30.64                           | 29.75                           | 28.26                           | 28.63 | 27.01                           | 25.51                           | 21.89                           | 13.95          |
|             | Other source <sup>#</sup> [19] |                | 45.21                           | 36.43                           |                      | 30.28                           | 29.72                           | 29.34                            |                                 |                                 |                                 | 27.30 |                                 |                                 |                                 | 14.06          |
| G           | This work                      | 28.13          | 22.06                           | 19.16                           | 17.08                | 22.90                           | 23.61                           | 25.42                            | 24.65                           | 24.55                           | 22.90                           | 25.80 | 17.33                           | 22.91                           | 13.85                           | 3.26           |
|             | Other source <sup>#</sup> [19] |                | 30.62                           | 18.35                           |                      | 25.25                           | 27.86                           | 29.72                            |                                 |                                 |                                 | 24.13 |                                 |                                 |                                 | 5.41           |
| Y           | This work                      | 67.13          | 56.56                           | 49.09                           | 44.52                | 55.31                           | 56.56                           | 59.87                            | 58.31                           | 57.77                           | 54.08                           | 59.51 | 42.83                           | 52.89                           | 34.31                           | 9.07           |
|             | Other source <sup>#</sup> [19] |                | 75.00                           | 47.24                           |                      | 59.53                           | 63.26                           | 65.68                            |                                 |                                 |                                 | 55.43 |                                 |                                 |                                 | 14.37          |
| $\nu$       | This work                      | 0.19           | 0.28                            | 0.28                            | 0.30                 | 0.21                            | 0.20                            | 0.18                             | 0.18                            | 0.18                            | 0.18                            | 0.15  | 0.24                            | 0.15                            | 0.24                            | 0.39           |
|             | Other source <sup>#</sup> [19] |                | 0.22                            | 0.28                            |                      | 0.17                            | 0.15                            | 0.13                             |                                 |                                 |                                 | 0.16  |                                 |                                 |                                 | 0.33           |

<sup>#</sup> Values are extracted from the figures in ref.[19]

Table T12: Shear modulus (G), Bulk modulus (B), Young's modulus (Y) and Poisson's ratio ( $\nu$ ) for Li, Sn, and Li-Sn compounds at 5 GPa. Except for  $\nu$ , all quantities are in units of GPa.

| Elements    | Sn                   | Li <sub>2</sub> Sn <sub>5</sub> | Li <sub>1</sub> Sn <sub>1</sub> | Li <sub>7</sub> Sn <sub>3</sub> | Li <sub>5</sub> Sn <sub>2</sub> | Li <sub>13</sub> Sn <sub>5</sub> | Li <sub>8</sub> Sn <sub>3</sub> | Li <sub>3</sub> Sn <sub>1</sub> | Li <sub>7</sub> Sn <sub>2</sub> | Li <sub>4</sub> Sn <sub>1</sub> | Li <sub>7</sub> Sn <sub>1</sub> | Li <sub>5</sub> Sn <sub>1</sub> | Li             |
|-------------|----------------------|---------------------------------|---------------------------------|---------------------------------|---------------------------------|----------------------------------|---------------------------------|---------------------------------|---------------------------------|---------------------------------|---------------------------------|---------------------------------|----------------|
| Space group | I4 <sub>1</sub> /amd | Pbam                            | P2/m                            | P2 <sub>1</sub> /m              | R $\bar{3}$ m                   | P $\bar{3}$ m1                   | R $\bar{3}$ m                   | Fm $\bar{3}$ m                  | P $\bar{3}$ m1                  | R $\bar{3}$ m                   | C2/m                            | C2/m                            | Im $\bar{3}$ m |
| B           | 67.20                | 60.43                           | 54.17                           | 47.16                           | 46.67                           | 46.17                            | 45.74                           | 43.81                           | 42.94                           | 41.77                           | 40.06                           | 35.70                           | 24.29          |
| G           | 32.09                | 30.68                           | 30.48                           | 33.87                           | 34.97                           | 35.22                            | 34.59                           | 31.29                           | 31.51                           | 21.13                           | 33.75                           | 21.57                           | 9.61           |
| Y           | 83.04                | 78.72                           | 77.00                           | 81.98                           | 83.95                           | 84.23                            | 82.89                           | 75.82                           | 75.95                           | 54.24                           | 79.05                           | 53.85                           | 25.47          |
| $\nu$       | 0.29                 | 0.28                            | 0.26                            | 0.21                            | 0.20                            | 0.20                             | 0.20                            | 0.21                            | 0.21                            | 0.28                            | 0.17                            | 0.25                            | 0.32           |

Table T13: Shear modulus (G), Bulk modulus (B), Young's modulus (Y) and Poisson's ratio ( $\nu$ ) for Li, Sn, and Li-Sn compounds at 10 GPa. Except for  $\nu$ , all quantities are in units of GPa.

| Elements    | Sn     | Li <sub>2</sub> Sn <sub>5</sub> | Li <sub>1</sub> Sn <sub>1</sub> | Li <sub>7</sub> Sn <sub>3</sub> | Li <sub>5</sub> Sn <sub>2</sub> | Li <sub>13</sub> Sn <sub>5</sub> | Li <sub>8</sub> Sn <sub>3</sub> | Li <sub>3</sub> Sn <sub>1</sub> | Li <sub>7</sub> Sn <sub>2</sub> | Li <sub>4</sub> Sn <sub>1</sub> | Li <sub>7</sub> Sn <sub>1</sub> | Li <sub>5</sub> Sn <sub>1</sub> | Li             |
|-------------|--------|---------------------------------|---------------------------------|---------------------------------|---------------------------------|----------------------------------|---------------------------------|---------------------------------|---------------------------------|---------------------------------|---------------------------------|---------------------------------|----------------|
| Space group | I4/mmm | Pbam                            | Pm $\bar{3}$ m                  | P2 <sub>1</sub> /m              | R $\bar{3}$ m                   | P $\bar{3}$ m1                   | R $\bar{3}$ m                   | Fm $\bar{3}$ m                  | P $\bar{3}$ m1                  | R $\bar{3}$ m                   | C2/m                            | C2/m                            | Fm $\bar{3}$ m |
| B           | 82.31  | 75.87                           | 66.97                           | 58.23                           | 57.61                           | 58.72                            | 58.22                           | 54.18                           | 55.03                           | 53.79                           | 51.80                           | 45.36                           | 33.59          |
| G           | 19.81  | 37.58                           | 28.89                           | 41.00                           | 41.81                           | 43.25                            | 41.48                           | 34.73                           | 39.11                           | 26.96                           | 40.46                           | 30.54                           | 8.48           |
| Y           | 55.02  | 96.76                           | 75.76                           | 99.62                           | 101.00                          | 104.17                           | 100.55                          | 85.84                           | 94.86                           | 69.31                           | 96.31                           | 74.84                           | 23.47          |
| $\nu$       | 0.39   | 0.29                            | 0.31                            | 0.21                            | 0.21                            | 0.20                             | 0.21                            | 0.24                            | 0.21                            | 0.29                            | 0.19                            | 0.23                            | 0.38           |

Table T14: Shear modulus (G), Bulk modulus (B), Young's modulus (Y) and Poisson's ratio ( $\nu$ ) for Li, Sn, and Li-Sn compounds at 20 GPa. Except for  $\nu$ , all quantities are in units of GPa.

| Elements    | Sn     | Li <sub>2</sub> Sn <sub>5</sub> | Li <sub>1</sub> Sn <sub>1</sub> | Li <sub>7</sub> Sn <sub>3</sub> | Li <sub>5</sub> Sn <sub>2</sub> | Li <sub>13</sub> Sn <sub>5</sub> | Li <sub>8</sub> Sn <sub>3</sub> | Li <sub>3</sub> Sn <sub>1</sub> | Li <sub>7</sub> Sn <sub>2</sub> | Li <sub>4</sub> Sn <sub>1</sub> | Li <sub>7</sub> Sn <sub>1</sub> | Li <sub>5</sub> Sn <sub>1</sub> | Li             |
|-------------|--------|---------------------------------|---------------------------------|---------------------------------|---------------------------------|----------------------------------|---------------------------------|---------------------------------|---------------------------------|---------------------------------|---------------------------------|---------------------------------|----------------|
| Space group | I4/mmm | Pbam                            | Pm $\bar{3}$ m                  | P2 <sub>1</sub> /m              | R $\bar{3}$ m                   | P $\bar{3}$ m1                   | R $\bar{3}$ m                   | Fm $\bar{3}$ m                  | P $\bar{3}$ m1                  | I4/m                            | C2/m                            | P $\bar{1}$                     | Fm $\bar{3}$ m |
| B           | 114.59 | 105.02                          | 92.98                           | 81.10                           | 80.20                           | 79.27                            | 78.62                           | 76.09                           | 74.57                           | 73.76                           | 71.32                           | 66.08                           | 50.21          |
| G           | 34.38  | 48.20                           | 41.66                           | 55.61                           | 55.55                           | 55.18                            | 51.80                           | 44.36                           | 51.31                           | 56.36                           | 56.49                           | 46.15                           | 9.26           |
| Y           | 93.76  | 125.41                          | 108.75                          | 135.80                          | 135.40                          | 134.36                           | 127.41                          | 111.42                          | 125.21                          | 134.75                          | 134.06                          | 112.30                          | 26.16          |
| $\nu$       | 0.36   | 0.30                            | 0.31                            | 0.22                            | 0.22                            | 0.22                             | 0.23                            | 0.26                            | 0.22                            | 0.20                            | 0.19                            | 0.22                            | 0.41           |

### 13. Total and local DOS of Li-Sn compounds at 1 atm pressure

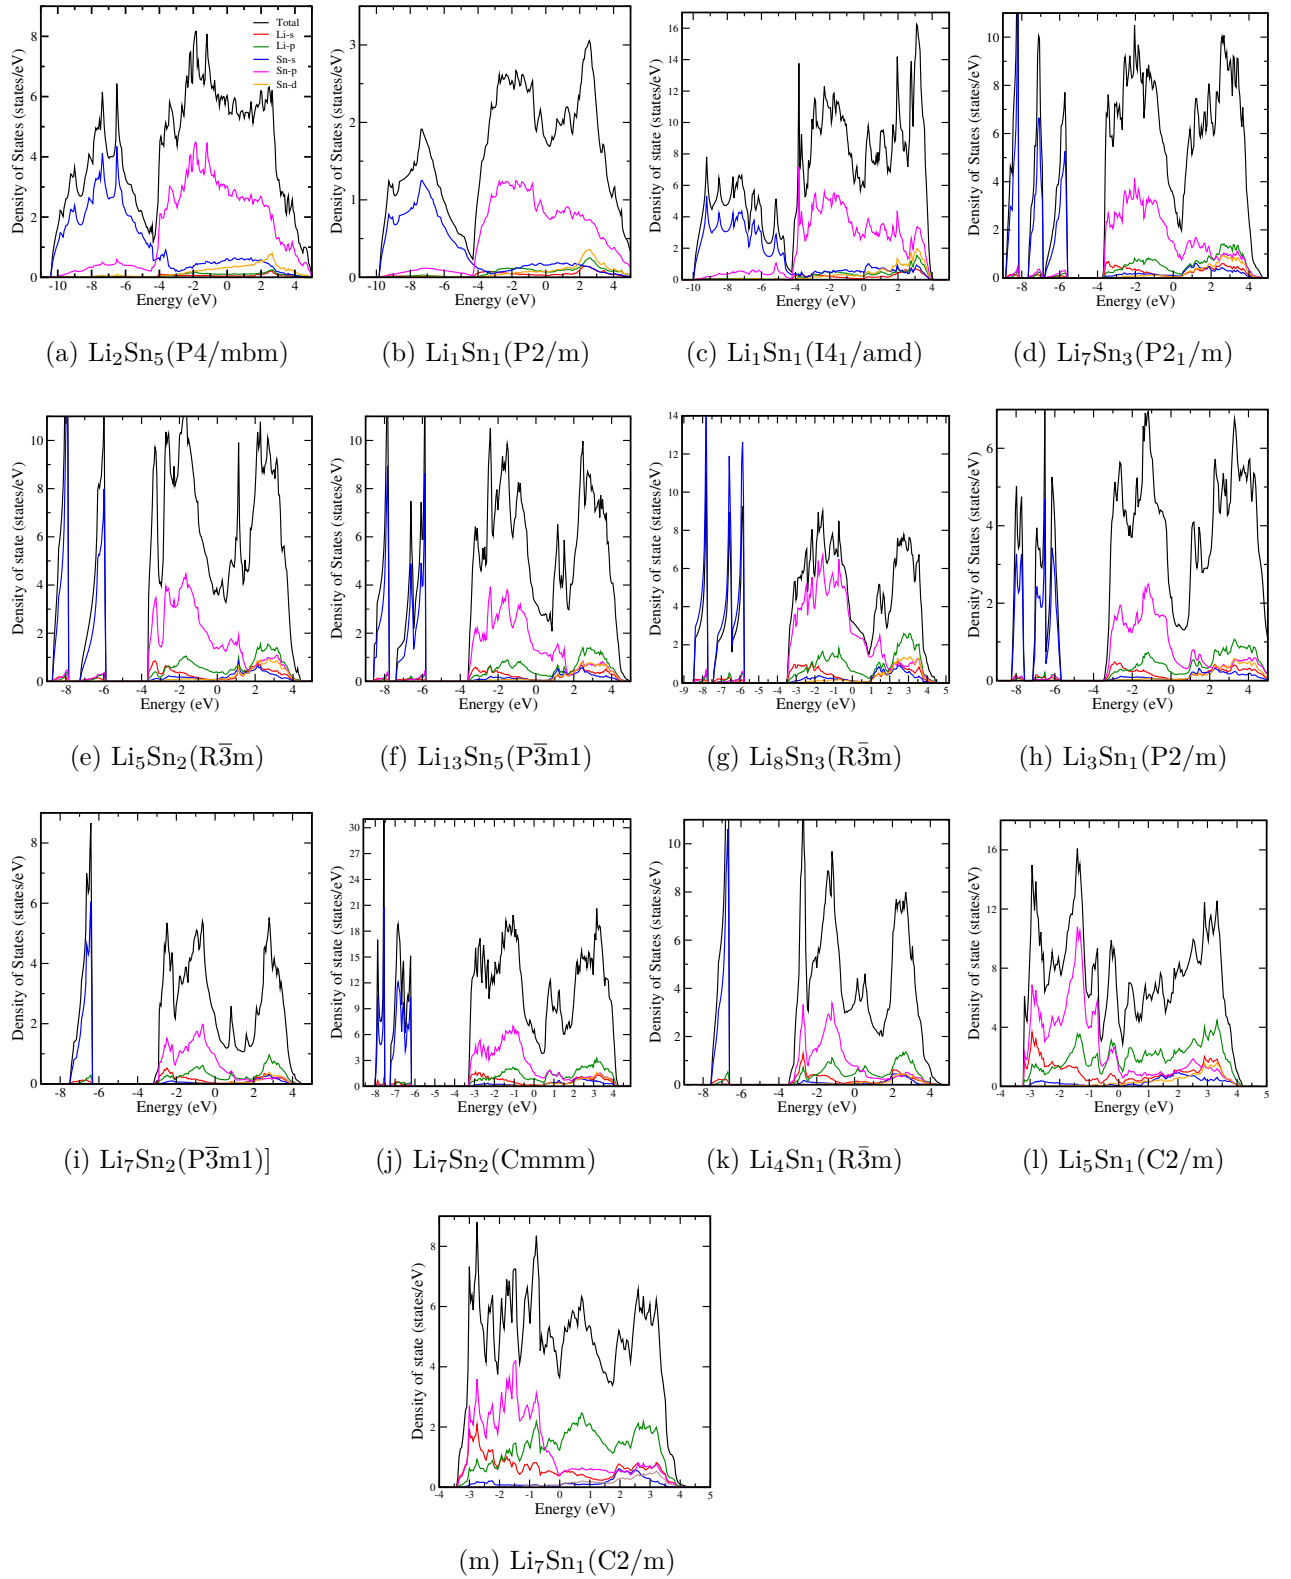

Figure S12: Total and local DOS of: (a)  $\text{Li}_2\text{Sn}_5(\text{P4}/\text{mbm})$ , (b)  $\text{Li}_1\text{Sn}_1(\text{P2}/\text{m})$ , (c)  $\text{Li}_1\text{Sn}_1(\text{I4}_1/\text{amd})$ , (d)  $\text{Li}_7\text{Sn}_3(\text{P2}_1/\text{m})$ , (e)  $\text{Li}_5\text{Sn}_2(\text{R}\bar{3}\text{m})$ , (f)  $\text{Li}_{13}\text{Sn}_5(\text{P}\bar{3}\text{m1})$ , (g)  $\text{Li}_8\text{Sn}_3(\text{R}\bar{3}\text{m})$ , (h)  $\text{Li}_3\text{Sn}_1(\text{P2}/\text{m})$ , (i)  $\text{Li}_7\text{Sn}_2(\text{P}\bar{3}\text{m1})$ , (j)  $\text{Li}_7\text{Sn}_2(\text{Cmmm})$ , (k)  $\text{Li}_4\text{Sn}_1(\text{R}\bar{3}\text{m})$ , (l)  $\text{Li}_5\text{Sn}_1(\text{C2}/\text{m})$  and (m)  $\text{Li}_7\text{Sn}_1(\text{C2}/\text{m})$ , compounds at 1 atm pressure.

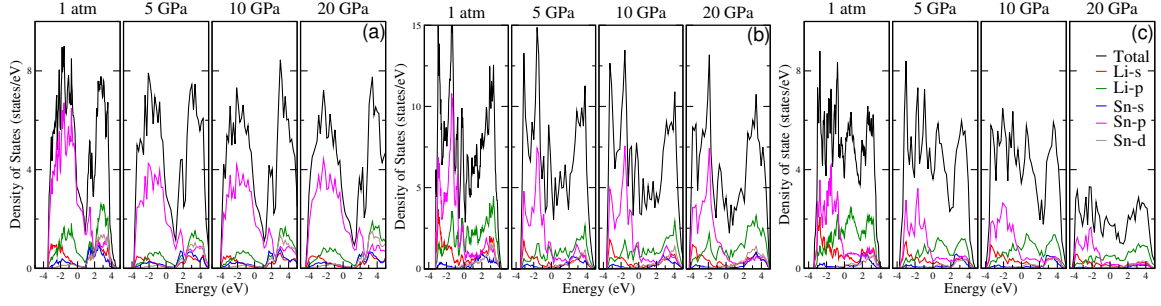

Figure S13: Total and partial density of states (DOS) of: (a)  $\text{Li}_8\text{Sn}_3$ , (b)  $\text{Li}_5\text{Sn}_1$ , and (c)  $\text{Li}_7\text{Sn}_1$ , at 1 atm, 5, 10, and 20 GPa pressure.

Figure S12 in SI depicts the calculated total electronic density of states (DOS) along with the atom resolved partial density of states (PDOS) of all the phases at 1 atm. The crossover of several bands at Fermi level ( $E_F$ , set to zero) indicate all Li-Sn compounds to exhibit metallic nature, thus, providing a better electrical conductivity. For most of the Li-Sn phases, the PDOS show a large overlap between Sn-5p and Li-2s and/or Li-2p states at the Fermi level, which illustrates the charge transfer from Li-2s and/or Li-2p to Sn-5p. One can see that the main contribution to total DOS near  $E_F$  comes from the Sn-5p state but, as expected this gets weakened with the increase in Li-concentration, which is also in agreement with the work of Zhang et al.[19] on Li-Sn systems at ambient conditions. Moreover, this is also very similar to what is observed recently by Zhang et al.[20] and Yang et al.[21] for Li-Si and Li-Au systems at high pressure, respectively. Finally, in Li-rich phases where  $x \geq 4$ , Li-2s and Li-2p states dominate and provide major contribution to the total DOS near  $E_F$ , as compared to Sn-5p state, owing to the exceptionally high concentration of Li (Figure S12 in SI). In order to determine the effect of pressure on density of states, we present DOS for three of the yet unexplored compounds ( $\text{Li}_8\text{Sn}_3$ ,  $\text{Li}_5\text{Sn}_1$ , and  $\text{Li}_7\text{Sn}_1$ ) at different pressure values in Figure S13. It is evident from the figure that the nature of DOS is mainly insensitive to the applied pressure. The application of pressure in GPa though decreases the intensity of peaks (density/states) as compared to 1 atm pressure, but other than that no distinct change is noticed for any particular phase within the pressure value of 5–20 GPa.

## 14. Theoretical XRD pattern of different Li-Sn compounds

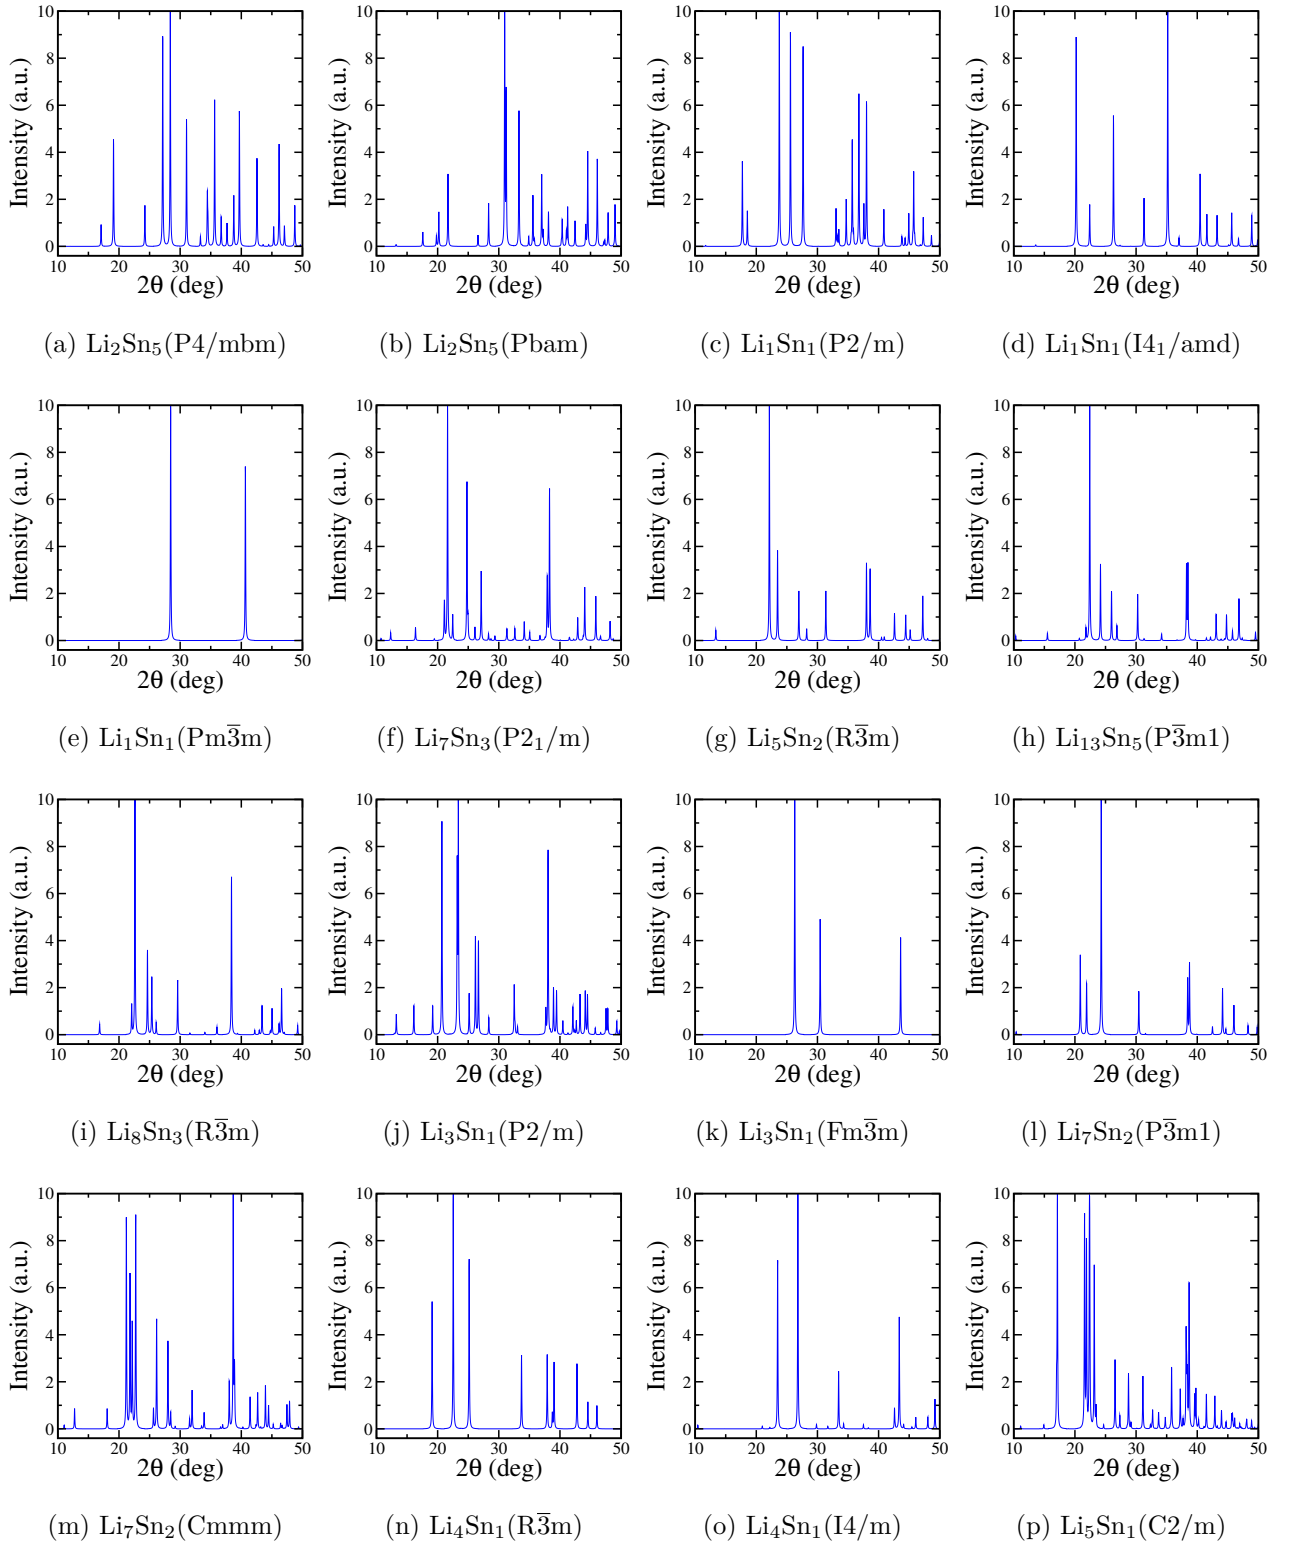

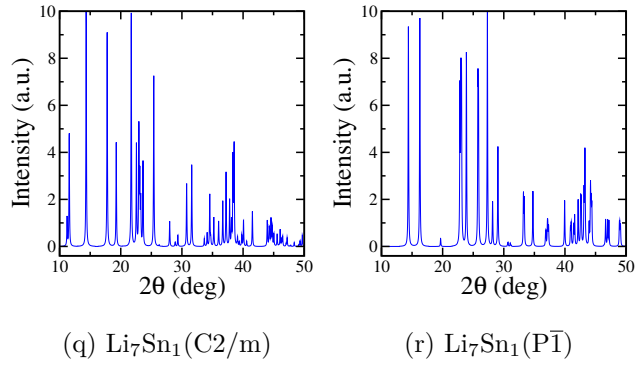

Figure S14: Theoretical X-ray diffraction pattern of: (a)  $\text{Li}_2\text{Sn}_5(\text{P4/mbm})$ , (b)  $\text{Li}_2\text{Sn}_5(\text{Pbam})$ , (c)  $\text{Li}_1\text{Sn}_1(\text{P2/m})$ , (d)  $\text{Li}_1\text{Sn}_1(\text{I4}_1/\text{amd})$ , (e)  $\text{Li}_1\text{Sn}_1(\text{Pm}\bar{3}\text{m})$ , (f)  $\text{Li}_7\text{Sn}_3(\text{P2}_1/\text{m})$ , (g)  $\text{Li}_5\text{Sn}_2(\text{R}\bar{3}\text{m})$ , (h)  $\text{Li}_{13}\text{Sn}_5(\text{P}\bar{3}\text{m1})$ , (i)  $\text{Li}_8\text{Sn}_3(\text{R}\bar{3}\text{m})$ , (j)  $\text{Li}_3\text{Sn}_1(\text{P2/m})$ , (k)  $\text{Li}_3\text{Sn}_1(\text{Fm}\bar{3}\text{m})$ , (l)  $\text{Li}_7\text{Sn}_2(\text{P}\bar{3}\text{m1})$ , (m)  $\text{Li}_7\text{Sn}_2(\text{Cmmm})$ , (n)  $\text{Li}_4\text{Sn}_1(\text{R}\bar{3}\text{m})$ , (o)  $\text{Li}_4\text{Sn}_1(\text{I4/m})$  (p)  $\text{Li}_5\text{Sn}_1(\text{C2/m})$ , (q)  $\text{Li}_7\text{Sn}_1(\text{C2/m})$  and  $\text{Li}_7\text{Sn}_1(\text{P}\bar{1})$ , studied in these work. The wavelength of Cu  $\text{K}_\alpha$  radiation is used for simulations of XRD pattern *via* Mercury software.[9]



- 
- [1] Zhang, W.; Oganov, A. R.; Goncharov, A. F.; Zhu, Q.; Boulfelfel, S. E.; Lyakhov, A. O.; Stavrou, E.; Somayazulu, M.; Prakapenka, V. B.; Konôpková, Z. Unexpected Stable Stoichiometries of Sodium Chlorides. *Science* 2013, *342*, 1502-1505.
- [2] Zeng, Z.; Zeng, Q.; Liu, N.; Oganov, A. R.; Zeng, Q.; Cui, Y.; Mao, W. L. A Novel Phase of  $\text{Li}_{15}\text{Si}_4$  Synthesized Under Pressure. *Adv. Energy Mater.* 2015, *5*, 1500214.
- [3] Kresse, G.; Furthmüller, J. Efficient Iterative Schemes for *ab initio* Total-Energy Calculations using a Plane-Wave Basis Set. *Phys. Rev. B* 1996, *54*, 11169-11186.
- [4] Kresse, G.; Furthmüller, J. Efficiency of *ab-initio* Total Energy Calculations for Metals and Semiconductors using a Plane-Wave Basis Set. *Comput. Mater. Sci.* 1996, *6*, 15-50.
- [5] Blöchl, P. E. Projector Augmented-Wave Method. *Phys. Rev. B* 1994, *50*, 17953-17979.
- [6] Perdew, J. P.; Burke, K.; Ernzerhof, M. Generalized Gradient Approximation Made Simple. *Phys. Rev. Lett.* 1996, *77*, 3865-3868.
- [7] Togo, A.; Oba, F.; Tanaka, I. First-Principles Calculations of the Ferroelastic Transition between Rutile-type and  $\text{CaCl}_2$ -type  $\text{SiO}_2$  at High Pressures. *Phys. Rev. B* 2008, *78*, 134106.
- [8] Hill, R. The Elastic Behaviour of a Crystalline Aggregate. *Proceedings of the Physical Society. Section A* 1952, *65*, 349-354.
- [9] Macrae, C. F.; Bruno, I. J.; Chisholm, J. A.; Edgington, P. R.; McCabe, P.; Pidcock, E.; and Rodriguez-Monge, L.; Taylor, R.; van de Streek, J.; Wood, P. A. *Mercury CSD 2.0* - New Features for the Visualization and Investigation of Crystal Structures. *J. Appl. Crystallogr.* 2008, *41*, 466-470
- [10] Hansen, D.A.; Chang, L. J. Crystal Structure of  $\text{Li}_2\text{Sn}_5$  *Acta Cryst.* 1969, *B25*, 2392-2395.
- [11] Müller, W.; Schäfer, H. The Crystal Structure of  $\text{LiSn}$ . *Z. Naturforsch.* 1973, *28b*, 246-248.
- [12] Blase, W.; Cordier, G. Crystal Structure of  $\beta$ -Lithium stannide,  $\beta$ - $\text{LiSn}$ . *Zeitschrift für Kristallographie* 1990, *193*, 317-318.
- [13] Müller, W. Preparation and Crystal Structure of  $\text{Li}_7\text{Sn}_3$ . *Z. Naturforsch.* 1974, *29b*, 304-307.
- [14] Frank, U.; Müller, W.; Schäfer, H. The Crystal Structure of  $\text{Li}_5\text{Sn}_2$ . *Z. Naturforsch.* 1975, *30b*, 1-5.

- [15] Frank, U.; Müller, W.; Schäfer, H. The Crystal Structure of  $\text{Li}_7\text{Sn}_2$ . *Z. Naturforsch.* 1975, *30b*, 6-9.
- [16] Frank, U.; Müller, W. The Preparation and Crystal Structures of  $\text{Li}_{13}\text{Sn}_5$  and Structural Relations between the Phases of the Systems Li-Sn and Li-Pb. *Z. Naturforsch.* 1975, *30b*, 316-322.
- [17] Genser, O.; Hafner, J. Structure and Bonding in Crystalline and Molten Li-Sn Alloys: A First-Principles Density-Functional Study. *Phys. Rev. B* 2001, *63*, 144204.
- [18] Morris, A. J.; Grey, C. P.; Pickard, C. J. Thermodynamically Stable Lithium Silicides and Germanides from Density Functional Theory Calculations. *Phys. Rev. B* 2014, *90*, 054111.
- [19] Zhang, P.; Ma, Z.; Wang, Y.; Zou, Y.; Lei, W.; Pan, Y.; Lu, C. A First Principles Study of the Mechanical Properties of Li-Sn Alloys. *RSC Adv.* 2015, *5*, 36022-36029
- [20] Zhang, S.; Wang, Y.; Yang, G.; Ma, Y. Silicon Framework-Based Lithium Silicides at High Pressures. *ACS Appl. Mater. Interfaces* 2016, *8*, 16761-16767.
- [21] Yang, G.; Wang, Y.; Peng, F.; Bergara, A.; Ma, Y. Gold as a 6p-Element in Dense Lithium Aurides. *J. Am. Chem. Soc.* 2016, *138*, 4046-4052.
